# Supplementary material
Source: publisher site journal article supplement (https://www.dovepress.com/article/supplementary_file/263733/263733-Table-S1_1.xlsx)
Supplement: Supplementary file 1 [file 263733-Table-S1_1.xlsx]

## Sheet: DEmRNAs
Table S1
GeneID	symbol	logFC	PValue	FDR
ENSG00000169605	GKN1	-7.17093	1.44114e-23	2.19859e-21
ENSG00000182333	LIPF	-5.44482	1.52607e-13	3.03672e-12
ENSG00000119147	C2orf40	-5.12611	1.06979e-39	1.84966e-36
ENSG00000164530	PI16	-4.87571	1.26434e-44	3.27907e-41
ENSG00000143196	DPT	-4.61028	1.33989e-56	1.0425e-52
ENSG00000168079	SCARA5	-4.57987	2.10806e-49	1.09345e-45
ENSG00000162706	CADM3	-4.56413	1.94872e-39	3.03241e-36
ENSG00000018625	ATP1A2	-4.49577	5.77997e-36	6.42444e-33
ENSG00000196616	ADH1B	-4.41074	8.67658e-30	3.21467e-27
ENSG00000175785	PRIMA1	-4.37777	2.0378e-34	2.11401e-31
ENSG00000171243	SOSTDC1	-4.36365	1.38388e-32	8.97273e-30
ENSG00000165072	MAMDC2	-4.35386	5.07536e-45	1.57955e-41
ENSG00000100604	CHGA	-4.29965	1.25417e-18	7.47745e-17
ENSG00000153446	C16orf89	-4.23535	1.89309e-41	3.68229e-38
ENSG00000175084	DES	-4.21851	1.24111e-08	9.11415e-08
ENSG00000104332	SFRP1	-4.2073	8.97072e-34	7.34702e-31
ENSG00000167653	PSCA	-4.11251	4.3343e-10	4.31241e-09
ENSG00000118729	CASQ2	-4.04478	1.93505e-29	6.6914e-27
ENSG00000136546	SCN7A	-3.98251	1.14659e-25	2.37894e-23
ENSG00000196482	ESRRG	-3.95893	1.90309e-33	1.4807e-30
ENSG00000167676	PLIN4	-3.84118	4.59653e-27	1.13534e-24
ENSG00000197565	COL4A6	-3.79772	1.03599e-30	5.03784e-28
ENSG00000101938	CHRDL1	-3.78435	7.92819e-22	8.39255e-20
ENSG00000166292	TMEM100	-3.755	8.50343e-34	7.34702e-31
ENSG00000163815	CLEC3B	-3.72649	1.28865e-64	2.00526e-60
ENSG00000133392	MYH11	-3.70884	4.48276e-10	4.4459e-09
ENSG00000116194	ANGPTL1	-3.68515	3.79757e-29	1.25732e-26
ENSG00000109906	ZBTB16	-3.65462	3.53953e-30	1.48861e-27
ENSG00000125285	SOX21	-3.61244	1.27172e-12	2.11197e-11
ENSG00000154330	PGM5	-3.592	2.47063e-25	4.92891e-23
ENSG00000151632	AKR1C2	-3.5718	1.28519e-30	5.71395e-28
ENSG00000084674	APOB	-3.56493	4.23484e-11	5.15234e-10
ENSG00000170323	FABP4	-3.536	6.2208e-27	1.46669e-24
ENSG00000205364	MT1M	-3.52588	8.95565e-33	6.05908e-30
ENSG00000004776	HSPB6	-3.49827	5.19084e-13	9.28444e-12
ENSG00000112936	C7	-3.48399	1.81998e-15	5.30149e-14
ENSG00000122367	LDB3	-3.40798	2.38139e-26	5.29384e-24
ENSG00000151892	GFRA1	-3.40423	5.01907e-24	8.3087e-22
ENSG00000197766	CFD	-3.38925	3.8861e-37	4.65166e-34
ENSG00000198074	AKR1B10	-3.38364	6.63117e-09	5.1827e-08
ENSG00000163017	ACTG2	-3.37268	2.04168e-09	1.77855e-08
ENSG00000130176	CNN1	-3.36025	2.48106e-11	3.16134e-10
ENSG00000149294	NCAM1	-3.34373	4.92144e-34	4.78641e-31
ENSG00000108823	SGCA	-3.32669	4.86557e-28	1.3766e-25
ENSG00000133800	LYVE1	-3.26609	1.75765e-46	6.8377e-43
ENSG00000198523	PLN	-3.25953	4.24761e-22	4.72122e-20
ENSG00000152137	HSPB8	-3.22456	2.04245e-25	4.12761e-23
ENSG00000181856	SLC2A4	-3.21232	7.66784e-30	2.98298e-27
ENSG00000068976	PYGM	-3.17347	1.1291e-30	5.16763e-28
ENSG00000022267	FHL1	-3.16582	6.2282e-18	3.06623e-16
ENSG00000134201	GSTM5	-3.14636	1.56889e-38	2.21941e-35
ENSG00000018236	CNTN1	-3.14551	4.18229e-17	1.75419e-15
ENSG00000182253	SYNM	-3.13048	1.19042e-11	1.63353e-10
ENSG00000075073	TACR2	-3.12795	8.29573e-16	2.58697e-14
ENSG00000163431	LMOD1	-3.10759	5.32592e-15	1.38822e-13
ENSG00000244734	HBB	-3.09718	1.0598e-25	2.22859e-23
ENSG00000163884	KLF15	-3.09565	1.66681e-24	3.05144e-22
ENSG00000108381	ASPA	-3.0941	8.78637e-33	6.05908e-30
ENSG00000164120	HPGD	-3.09375	2.42259e-18	1.32739e-16
ENSG00000108924	HLF	-3.08708	4.86965e-30	1.94299e-27
ENSG00000101210	EEF1A2	-3.05179	1.10822e-13	2.26909e-12
ENSG00000171303	KCNK3	-3.04784	1.13614e-21	1.16312e-19
ENSG00000173641	HSPB7	-3.04197	2.5481e-16	9.01158e-15
ENSG00000187134	AKR1C1	-3.04048	1.29682e-23	2.01601e-21
ENSG00000146013	GFRA3	-3.03833	8.16927e-19	5.08488e-17
ENSG00000141338	ABCA8	-3.03557	8.17125e-23	1.00693e-20
ENSG00000119938	PPP1R3C	-3.02543	2.61559e-27	6.89851e-25
ENSG00000109846	CRYAB	-3.01312	8.4161e-28	2.2976e-25
ENSG00000166831	RBPMS2	-3.00112	3.77905e-25	7.44378e-23
ENSG00000164107	HAND2	-2.99584	1.06089e-10	1.18279e-09
ENSG00000213088	ACKR1	-2.98828	1.60622e-20	1.38858e-18
ENSG00000211445	GPX3	-2.98745	2.91888e-30	1.26168e-27
ENSG00000189377	CXCL17	-2.98599	2.42157e-08	1.67924e-07
ENSG00000168309	FAM107A	-2.9767	1.45223e-37	1.88318e-34
ENSG00000180251	SLC9A4	-2.96413	3.53052e-09	2.91142e-08
ENSG00000135333	EPHA7	-2.94274	2.91237e-13	5.43398e-12
ENSG00000176928	GCNT4	-2.93264	1.09516e-30	5.16415e-28
ENSG00000180875	GREM2	-2.93157	1.67533e-15	4.90956e-14
ENSG00000004799	PDK4	-2.92508	3.32231e-16	1.11901e-14
ENSG00000172403	SYNPO2	-2.92231	2.13515e-09	1.84789e-08
ENSG00000138722	MMRN1	-2.89433	7.6612e-27	1.77934e-24
ENSG00000176533	GNG7	-2.88175	1.12627e-43	2.50369e-40
ENSG00000067840	PDZD4	-2.87241	1.35301e-22	1.61956e-20
ENSG00000162409	PRKAA2	-2.87027	7.65901e-14	1.61493e-12
ENSG00000166165	CKB	-2.86796	2.74371e-16	9.50888e-15
ENSG00000169252	ADRB2	-2.85855	8.2303e-33	6.05908e-30
ENSG00000168631	DPCR1	-2.85237	9.88942e-06	4.06577e-05
ENSG00000131094	C1QL1	-2.84746	1.45023e-32	9.0268e-30
ENSG00000136842	TMOD1	-2.83086	1.34757e-24	2.52646e-22
ENSG00000147576	ADHFE1	-2.82612	6.52834e-32	3.90721e-29
ENSG00000145936	KCNMB1	-2.81164	1.76436e-22	2.01877e-20
ENSG00000106809	OGN	-2.80427	1.27862e-12	2.11891e-11
ENSG00000096088	PGC	-2.8027	0.00217735	0.00520457
ENSG00000203685	STUM	-2.78273	3.28859e-14	7.47062e-13
ENSG00000176490	DIRAS1	-2.77748	7.09062e-18	3.42662e-16
ENSG00000141052	MYOCD	-2.75793	3.81303e-19	2.55752e-17
ENSG00000137077	CCL21	-2.75729	1.1754e-12	1.9675e-11
ENSG00000170500	LONRF2	-2.75402	1.27005e-14	3.09109e-13
ENSG00000144218	AFF3	-2.75004	7.32763e-23	9.15713e-21
ENSG00000149596	JPH2	-2.7331	3.15509e-17	1.33777e-15
ENSG00000108602	ALDH3A1	-2.72242	8.24286e-11	9.47321e-10
ENSG00000189056	RELN	-2.72107	3.54188e-16	1.1802e-14
ENSG00000100628	ASB2	-2.7117	7.75618e-22	8.26864e-20
ENSG00000106278	PTPRZ1	-2.70984	3.87444e-13	7.10969e-12
ENSG00000163687	DNASE1L3	-2.69179	9.13513e-20	6.86724e-18
ENSG00000112964	GHR	-2.67872	5.10122e-28	1.4175e-25
ENSG00000164850	GPER1	-2.67602	5.95047e-23	7.58977e-21
ENSG00000188536	HBA2	-2.65739	1.52276e-23	2.25673e-21
ENSG00000122121	XPNPEP2	-2.65709	2.2092e-11	2.84581e-10
ENSG00000160307	S100B	-2.6378	5.04711e-29	1.63621e-26
ENSG00000171916	LGALS9C	-2.6352	6.43096e-14	1.38412e-12
ENSG00000174944	P2RY14	-2.62749	4.4344e-30	1.81589e-27
ENSG00000172260	NEGR1	-2.61513	8.21798e-23	1.00693e-20
ENSG00000160097	FNDC5	-2.61512	8.94774e-22	9.22091e-20
ENSG00000132465	JCHAIN	-2.61502	8.15057e-07	4.19692e-06
ENSG00000215218	UBE2QL1	-2.61188	8.50826e-22	8.82647e-20
ENSG00000168477	TNXB	-2.61013	2.07679e-16	7.51556e-15
ENSG00000105894	PTN	-2.6094	6.8063e-32	3.9227e-29
ENSG00000154175	ABI3BP	-2.5999	3.43485e-15	9.37715e-14
ENSG00000183454	GRIN2A	-2.59326	1.18812e-12	1.98372e-11
ENSG00000198848	CES1	-2.59129	6.90836e-14	1.47869e-12
ENSG00000178343	SHISA3	-2.57985	5.00883e-11	6.01408e-10
ENSG00000128573	FOXP2	-2.57929	2.42879e-15	6.8285e-14
ENSG00000182175	RGMA	-2.57556	1.17587e-12	1.9675e-11
ENSG00000059915	PSD	-2.57097	5.33026e-19	3.45601e-17
ENSG00000180155	LYNX1	-2.56981	2.43107e-15	6.8285e-14
ENSG00000065320	NTN1	-2.56858	2.98092e-19	2.03448e-17
ENSG00000205363	C15orf59	-2.56785	7.02929e-21	6.25044e-19
ENSG00000163145	C1QTNF7	-2.56783	6.71715e-17	2.63289e-15
ENSG00000046653	GPM6B	-2.56771	6.93597e-34	6.34886e-31
ENSG00000158246	FAM46B	-2.56701	6.35886e-17	2.51143e-15
ENSG00000173175	ADCY5	-2.55031	5.45358e-15	1.41912e-13
ENSG00000124440	HIF3A	-2.54642	7.98193e-14	1.68074e-12
ENSG00000149451	ADAM33	-2.54606	2.8711e-16	9.90626e-15
ENSG00000187288	CIDEC	-2.53437	1.73929e-09	1.53779e-08
ENSG00000198483	ANKRD35	-2.52889	2.72181e-27	7.05901e-25
ENSG00000087258	GNAO1	-2.52799	7.87517e-16	2.48571e-14
ENSG00000036672	USP2	-2.52361	4.36159e-26	9.42648e-24
ENSG00000159307	SCUBE1	-2.51929	6.9772e-23	8.82701e-21
ENSG00000101335	MYL9	-2.51441	6.917e-12	9.93864e-11
ENSG00000168032	ENTPD3	-2.50998	8.07495e-16	2.52825e-14
ENSG00000182575	NXPH3	-2.50392	4.10015e-14	9.14075e-13
ENSG00000167779	IGFBP6	-2.49805	3.81929e-31	1.91716e-28
ENSG00000175356	SCUBE2	-2.49729	3.4549e-24	5.90787e-22
ENSG00000129194	SOX15	-2.48736	4.57266e-21	4.31244e-19
ENSG00000145934	TENM2	-2.48403	3.87791e-12	5.82472e-11
ENSG00000175906	ARL4D	-2.47837	9.55579e-20	7.08084e-18
ENSG00000160181	TFF2	-2.47231	0.000297498	0.000876442
ENSG00000118432	CNR1	-2.47011	7.99709e-10	7.49416e-09
ENSG00000156113	KCNMA1	-2.46552	3.29896e-11	4.09371e-10
ENSG00000069535	MAOB	-2.46082	2.22909e-16	7.974e-15
ENSG00000158887	MPZ	-2.45935	2.14085e-29	7.24211e-27
ENSG00000170011	MYRIP	-2.45332	5.38024e-18	2.71824e-16
ENSG00000072195	SPEG	-2.44824	4.1784e-13	7.5958e-12
ENSG00000165495	PKNOX2	-2.44432	7.22034e-22	7.85704e-20
ENSG00000188153	COL4A5	-2.44133	4.60315e-17	1.88996e-15
ENSG00000068615	REEP1	-2.43831	2.74013e-16	9.50888e-15
ENSG00000139910	NOVA1	-2.43828	2.04768e-15	5.90073e-14
ENSG00000101955	SRPX	-2.41165	8.88693e-24	1.39686e-21
ENSG00000143546	S100A8	-2.41147	3.78681e-10	3.81649e-09
ENSG00000167641	PPP1R14A	-2.40912	4.06881e-21	3.88434e-19
ENSG00000243955	GSTA1	-2.40605	7.91075e-07	4.0856e-06
ENSG00000171431	KRT20	-2.39551	0.000135447	0.000434127
ENSG00000114790	ARHGEF26	-2.38701	4.3842e-19	2.89078e-17
ENSG00000168874	ATOH8	-2.38425	4.20151e-23	5.68519e-21
ENSG00000166482	MFAP4	-2.38152	9.83441e-12	1.3762e-10
ENSG00000106772	PRUNE2	-2.37308	5.38422e-09	4.28124e-08
ENSG00000132840	BHMT2	-2.36287	9.93766e-18	4.64384e-16
ENSG00000153902	LGI4	-2.35672	2.31731e-28	7.07052e-26
ENSG00000181449	SOX2	-2.34891	3.84404e-07	2.10327e-06
ENSG00000175287	PHYHD1	-2.34343	1.30851e-23	2.01601e-21
ENSG00000058866	DGKG	-2.3407	3.0574e-21	2.95504e-19
ENSG00000197380	DACT3	-2.33723	6.81487e-19	4.27606e-17
ENSG00000121552	CSTA	-2.32794	1.02148e-11	1.42304e-10
ENSG00000127241	MASP1	-2.32407	4.64399e-15	1.23319e-13
ENSG00000143502	SUSD4	-2.32289	1.57999e-12	2.58258e-11
ENSG00000198624	CCDC69	-2.31678	2.91224e-21	2.83234e-19
ENSG00000164764	SBSPON	-2.30743	2.36782e-17	1.02921e-15
ENSG00000126218	F10	-2.30712	7.68432e-16	2.43535e-14
ENSG00000178031	ADAMTSL1	-2.30591	1.7037e-29	6.02529e-27
ENSG00000263155	MYZAP	-2.29775	1.17985e-25	2.41575e-23
ENSG00000151320	AKAP6	-2.29738	2.55774e-16	9.02515e-15
ENSG00000170271	FAXDC2	-2.28584	6.79175e-25	1.30477e-22
ENSG00000144908	ALDH1L1	-2.28135	2.7037e-08	1.85495e-07
ENSG00000123119	NECAB1	-2.2764	6.47747e-15	1.66056e-13
ENSG00000184828	ZBTB7C	-2.27112	6.43822e-12	9.27761e-11
ENSG00000172016	REG3A	-2.26834	0.00192286	0.00465778
ENSG00000130988	RGN	-2.26044	5.4218e-12	7.91451e-11
ENSG00000170153	RNF150	-2.25741	7.52717e-14	1.58929e-12
ENSG00000188783	PRELP	-2.25679	7.201e-09	5.56655e-08
ENSG00000184564	SLITRK6	-2.25359	5.07087e-10	4.96901e-09
ENSG00000165449	SLC16A9	-2.24887	8.81663e-11	1.00583e-09
ENSG00000173267	SNCG	-2.24739	1.72211e-18	9.96196e-17
ENSG00000137094	DNAJB5	-2.24427	1.52858e-21	1.51504e-19
ENSG00000092096	SLC22A17	-2.24397	3.13062e-23	4.34961e-21
ENSG00000100321	SYNGR1	-2.2423	1.6879e-18	9.80051e-17
ENSG00000171533	MAP6	-2.23915	1.51029e-17	6.81206e-16
ENSG00000189129	PLAC9	-2.22586	4.15783e-28	1.19815e-25
ENSG00000103942	HOMER2	-2.2237	4.70035e-15	1.24482e-13
ENSG00000152580	IGSF10	-2.21868	5.62327e-12	8.19324e-11
ENSG00000134121	CHL1	-2.21375	3.51545e-16	1.17391e-14
ENSG00000105737	GRIK5	-2.21287	2.56797e-12	3.98804e-11
ENSG00000144331	ZNF385B	-2.20778	2.98276e-12	4.57738e-11
ENSG00000135063	FAM189A2	-2.20776	9.01317e-13	1.53619e-11
ENSG00000168824	HGNC:18790	-2.20761	2.97659e-15	8.22712e-14
ENSG00000138615	CILP	-2.20461	3.20716e-08	2.16421e-07
ENSG00000128591	FLNC	-2.20235	1.23638e-06	6.1724e-06
ENSG00000100842	EFS	-2.20037	2.50507e-24	4.37994e-22
ENSG00000198300	PEG3	-2.19934	3.87847e-14	8.70893e-13
ENSG00000137726	FXYD6	-2.19911	3.24983e-18	1.72009e-16
ENSG00000186868	MAPT	-2.19639	9.3541e-12	1.31253e-10
ENSG00000171714	ANO5	-2.19496	7.8291e-11	9.09848e-10
ENSG00000154721	JAM2	-2.1947	1.76283e-22	2.01877e-20
ENSG00000124205	EDN3	-2.19141	5.4619e-07	2.90971e-06
ENSG00000095637	SORBS1	-2.18995	1.60794e-10	1.73277e-09
ENSG00000124491	F13A1	-2.18899	2.44996e-13	4.67776e-12
ENSG00000185345	PRKN	-2.18873	1.19866e-24	2.27468e-22
ENSG00000157404	KIT	-2.18742	7.63799e-20	5.8839e-18
ENSG00000145362	ANK2	-2.18246	1.06139e-14	2.63059e-13
ENSG00000149591	TAGLN	-2.18195	2.56705e-09	2.17074e-08
ENSG00000072163	LIMS2	-2.18042	7.89728e-17	3.04182e-15
ENSG00000082175	PGR	-2.17869	5.86491e-15	1.51601e-13
ENSG00000146411	SLC2A12	-2.17792	6.2013e-17	2.45543e-15
ENSG00000077943	ITGA8	-2.17597	5.1304e-17	2.08444e-15
ENSG00000128849	CGNL1	-2.16483	1.6811e-17	7.56056e-16
ENSG00000132563	REEP2	-2.16043	7.50796e-14	1.58738e-12
ENSG00000109339	MAPK10	-2.15732	1.68168e-18	9.80051e-17
ENSG00000146267	FAXC	-2.1573	2.52024e-09	2.13719e-08
ENSG00000109472	CPE	-2.15462	1.46239e-16	5.39248e-15
ENSG00000135218	CD36	-2.15439	6.16185e-21	5.54246e-19
ENSG00000102109	PCSK1N	-2.15276	1.08557e-05	4.42794e-05
ENSG00000125740	FOSB	-2.15192	2.20765e-09	1.90007e-08
ENSG00000185437	SH3BGR	-2.15149	4.50611e-24	7.62169e-22
ENSG00000183578	TNFAIP8L3	-2.14096	2.11176e-20	1.79569e-18
ENSG00000172935	MRGPRF	-2.13946	4.04583e-13	7.38934e-12
ENSG00000177363	LRRN4CL	-2.13452	2.67482e-18	1.46045e-16
ENSG00000137860	SLC28A2	-2.1335	5.81652e-05	0.000202939
ENSG00000134917	ADAMTS8	-2.13092	1.41469e-09	1.27028e-08
ENSG00000101605	MYOM1	-2.12972	1.59999e-15	4.75142e-14
ENSG00000126803	HSPA2	-2.12884	1.25821e-21	1.27459e-19
ENSG00000197614	MFAP5	-2.12312	1.48874e-11	2.00747e-10
ENSG00000204323	SMIM5	-2.12255	6.48215e-21	5.79705e-19
ENSG00000187715	KBTBD12	-2.12162	7.738e-07	4.00702e-06
ENSG00000169083	AR	-2.12124	1.06593e-13	2.19394e-12
ENSG00000156218	ADAMTSL3	-2.12013	1.45049e-14	3.49397e-13
ENSG00000213366	GSTM2	-2.12012	2.28203e-31	1.22451e-28
ENSG00000235098	ANKRD65	-2.11428	5.42643e-18	2.73271e-16
ENSG00000124374	PAIP2B	-2.11147	5.86861e-17	2.34772e-15
ENSG00000188611	ASAH2	-2.11126	1.29641e-15	3.90957e-14
ENSG00000140287	HDC	-2.10811	1.31976e-13	2.65677e-12
ENSG00000177508	IRX3	-2.10604	3.88522e-09	3.17865e-08
ENSG00000172348	RCAN2	-2.1056	8.04431e-20	6.07658e-18
ENSG00000060709	RIMBP2	-2.10373	7.63004e-08	4.78947e-07
ENSG00000198626	RYR2	-2.1004	1.88485e-11	2.4793e-10
ENSG00000168306	ACOX2	-2.09991	6.66974e-20	5.18939e-18
ENSG00000129244	ATP1B2	-2.09844	1.69707e-17	7.60172e-16
ENSG00000102547	CAB39L	-2.09823	1.18892e-29	4.3025e-27
ENSG00000240771	ARHGEF25	-2.09604	6.88336e-18	3.33682e-16
ENSG00000095303	PTGS1	-2.09214	5.54901e-24	9.08927e-22
ENSG00000091622	PITPNM3	-2.09188	1.06549e-15	3.25098e-14
ENSG00000131386	GALNT15	-2.08996	2.28936e-15	6.46547e-14
ENSG00000187193	MT1X	-2.08269	2.4719e-24	4.37105e-22
ENSG00000198838	RYR3	-2.08107	3.4096e-15	9.32457e-14
ENSG00000138356	AOX1	-2.07649	1.24885e-10	1.37144e-09
ENSG00000134769	DTNA	-2.07547	1.94435e-12	3.10637e-11
ENSG00000012223	LTF	-2.0734	7.2292e-05	0.00024713
ENSG00000005249	PRKAR2B	-2.07238	4.67209e-20	3.72833e-18
ENSG00000112276	BVES	-2.07192	3.05277e-14	6.96541e-13
ENSG00000186642	PDE2A	-2.06927	1.45884e-23	2.20399e-21
ENSG00000168497	CAVIN2	-2.06914	6.008e-17	2.39719e-15
ENSG00000197576	HOXA4	-2.06726	2.83737e-17	1.21298e-15
ENSG00000131471	AOC3	-2.06681	2.96573e-12	4.55575e-11
ENSG00000136872	ALDOB	-2.06259	0.000108698	0.000356997
ENSG00000165996	HACD1	-2.06231	1.91143e-13	3.72263e-12
ENSG00000227051	C14orf132	-2.05639	8.44586e-16	2.62852e-14
ENSG00000123570	RAB9B	-2.04848	1.34837e-13	2.70735e-12
ENSG00000184226	PCDH9	-2.04608	9.42787e-09	7.1079e-08
ENSG00000130005	GAMT	-2.04434	1.01136e-15	3.10411e-14
ENSG00000127951	FGL2	-2.04406	2.35096e-12	3.67302e-11
ENSG00000172201	ID4	-2.04006	2.84893e-23	3.99421e-21
ENSG00000248144	ADH1C	-2.03603	3.89127e-05	0.000141147
ENSG00000198947	DMD	-2.03584	7.99569e-14	1.68136e-12
ENSG00000121440	PDZRN3	-2.03548	3.81157e-15	1.03151e-13
ENSG00000116741	RGS2	-2.02814	3.88866e-19	2.58596e-17
ENSG00000135842	FAM129A	-2.0231	3.53294e-12	5.33231e-11
ENSG00000130700	GATA5	-2.02245	0.000417927	0.00118674
ENSG00000121413	ZSCAN18	-2.02158	3.69637e-18	1.91094e-16
ENSG00000064300	NGFR	-2.02094	2.27971e-07	1.30902e-06
ENSG00000120885	CLU	-2.00971	5.07414e-08	3.30786e-07
ENSG00000108370	RGS9	-2.00928	1.0432e-15	3.19553e-14
ENSG00000184113	CLDN5	-2.00353	2.95468e-20	2.45212e-18
ENSG00000182983	ZNF662	-1.98982	1.14972e-13	2.33866e-12
ENSG00000128739	SNRPN	-1.98692	4.66156e-23	6.09568e-21
ENSG00000136274	NACAD	-1.98634	9.50971e-15	2.38678e-13
ENSG00000053438	NNAT	-1.98562	5.08925e-15	1.33648e-13
ENSG00000148180	GSN	-1.98251	2.84916e-23	3.99421e-21
ENSG00000151729	SLC25A4	-1.97876	1.66867e-26	3.76321e-24
ENSG00000154556	SORBS2	-1.97866	7.32579e-14	1.55309e-12
ENSG00000133083	DCLK1	-1.96901	1.04922e-11	1.45257e-10
ENSG00000102409	BEX4	-1.96879	5.56705e-20	4.41984e-18
ENSG00000077942	FBLN1	-1.9667	3.42369e-08	2.29638e-07
ENSG00000185432	METTL7A	-1.96662	1.1524e-18	6.89711e-17
ENSG00000168060	NAALADL1	-1.96599	4.4381e-18	2.2643e-16
ENSG00000065534	MYLK	-1.96597	6.16156e-08	3.93112e-07
ENSG00000150672	DLG2	-1.96137	4.73662e-14	1.044e-12
ENSG00000170381	SEMA3E	-1.9562	4.9293e-06	2.15342e-05
ENSG00000180447	GAS1	-1.95198	2.69643e-10	2.79541e-09
ENSG00000128594	LRRC4	-1.95107	4.28347e-23	5.72957e-21
ENSG00000134533	RERG	-1.95011	3.06399e-12	4.68357e-11
ENSG00000138685	FGF2	-1.94955	9.59796e-14	1.98873e-12
ENSG00000113389	NPR3	-1.94913	2.14268e-09	1.85235e-08
ENSG00000138944	KIAA1644	-1.9488	1.44858e-09	1.29697e-08
ENSG00000137273	FOXF2	-1.94868	2.52782e-16	8.96974e-15
ENSG00000163328	GPR155	-1.94811	1.80987e-19	1.3079e-17
ENSG00000136826	KLF4	-1.94671	3.07352e-18	1.64354e-16
ENSG00000205795	CYS1	-1.94655	1.09478e-09	1.00034e-08
ENSG00000169715	MT1E	-1.94512	1.35879e-10	1.48484e-09
ENSG00000154678	PDE1C	-1.94508	8.2911e-18	3.9576e-16
ENSG00000149582	TMEM25	-1.94485	5.95513e-21	5.43647e-19
ENSG00000145687	SSBP2	-1.9377	1.27596e-21	1.28098e-19
ENSG00000107317	PTGDS	-1.93165	1.43972e-09	1.28978e-08
ENSG00000196263	ZNF471	-1.93134	6.5386e-15	1.67347e-13
ENSG00000161281	COX7A1	-1.92959	3.22734e-24	5.58007e-22
ENSG00000071967	CYBRD1	-1.92669	5.57495e-13	9.86937e-12
ENSG00000078295	ADCY2	-1.92467	9.02414e-10	8.35861e-09
ENSG00000112562	SMOC2	-1.92462	1.99554e-08	1.40956e-07
ENSG00000156298	TSPAN7	-1.92012	1.27536e-15	3.85357e-14
ENSG00000182195	LDOC1	-1.91936	4.40418e-17	1.81786e-15
ENSG00000124212	PTGIS	-1.91336	3.93972e-07	2.15109e-06
ENSG00000154258	ABCA9	-1.91303	1.18999e-10	1.31423e-09
ENSG00000197361	FBXL22	-1.90717	6.01365e-14	1.30332e-12
ENSG00000019102	VSIG2	-1.9052	2.28826e-05	8.70815e-05
ENSG00000159388	BTG2	-1.90223	3.27376e-19	2.21491e-17
ENSG00000123243	ITIH5	-1.90181	2.8764e-13	5.3733e-12
ENSG00000165821	SALL2	-1.89923	1.3428e-11	1.82015e-10
ENSG00000189221	MAOA	-1.89803	8.89046e-13	1.5186e-11
ENSG00000152784	PRDM8	-1.89735	3.74668e-15	1.01927e-13
ENSG00000275395	FCGBP	-1.89448	0.000387318	0.00110873
ENSG00000106034	CPED1	-1.89371	4.8128e-12	7.09204e-11
ENSG00000157551	KCNJ15	-1.88934	5.02124e-09	4.01931e-08
ENSG00000113594	LIFR	-1.88824	3.1353e-13	5.822e-12
ENSG00000219607	PPP1R3G	-1.88634	2.08395e-15	5.97992e-14
ENSG00000146122	DAAM2	-1.88482	1.75712e-15	5.12992e-14
ENSG00000120129	DUSP1	-1.88384	6.7085e-15	1.71414e-13
ENSG00000103034	NDRG4	-1.8835	7.74604e-20	5.93774e-18
ENSG00000166816	LDHD	-1.88174	2.83735e-14	6.5121e-13
ENSG00000198910	L1CAM	-1.88164	5.77515e-07	3.06087e-06
ENSG00000182636	NDN	-1.87857	1.94761e-18	1.09807e-16
ENSG00000124749	COL21A1	-1.87391	2.97164e-10	3.05629e-09
ENSG00000154734	ADAMTS1	-1.87065	2.28897e-15	6.46547e-14
ENSG00000107562	CXCL12	-1.87051	1.84652e-13	3.60071e-12
ENSG00000145861	C1QTNF2	-1.86985	2.70353e-16	9.45384e-15
ENSG00000180871	CXCR2	-1.86731	1.56486e-08	1.12683e-07
ENSG00000159228	CBR1	-1.86616	2.3146e-24	4.13994e-22
ENSG00000021645	NRXN3	-1.86553	1.46906e-07	8.7219e-07
ENSG00000172915	NBEA	-1.86386	1.42596e-09	1.27892e-08
ENSG00000147036	LANCL3	-1.8631	1.76887e-13	3.46667e-12
ENSG00000088386	SLC15A1	-1.86206	0.000480576	0.00134332
ENSG00000100626	GALNT16	-1.86041	3.75638e-09	3.08459e-08
ENSG00000172236	TPSAB1	-1.85921	1.71872e-10	1.84322e-09
ENSG00000076344	RGS11	-1.85786	1.62695e-11	2.16941e-10
ENSG00000198467	TPM2	-1.85745	1.04792e-08	7.82097e-08
ENSG00000166402	TUB	-1.85726	7.08719e-11	8.31703e-10
ENSG00000090530	P3H2	-1.85479	3.08651e-13	5.73825e-12
ENSG00000129538	RNASE1	-1.85051	2.53055e-11	3.21977e-10
ENSG00000154553	PDLIM3	-1.84802	4.2226e-09	3.42229e-08
ENSG00000177098	SCN4B	-1.84735	1.13999e-13	2.32496e-12
ENSG00000136732	GYPC	-1.84531	2.69536e-18	1.46652e-16
ENSG00000132514	CLEC10A	-1.84504	1.80341e-10	1.92872e-09
ENSG00000143816	WNT9A	-1.84497	2.21526e-09	1.90521e-08
ENSG00000179094	PER1	-1.84123	3.34767e-18	1.7599e-16
ENSG00000144712	CAND2	-1.84113	2.18572e-11	2.82055e-10
ENSG00000055118	KCNH2	-1.84078	1.13248e-08	8.37974e-08
ENSG00000144857	BOC	-1.8381	4.31837e-10	4.2993e-09
ENSG00000183844	FAM3B	-1.83684	3.15958e-05	0.00011659
ENSG00000168077	SCARA3	-1.8348	6.43906e-12	9.27761e-11
ENSG00000145147	SLIT2	-1.82947	5.57682e-09	4.41408e-08
ENSG00000250722	SELENOP	-1.82907	1.7831e-11	2.35542e-10
ENSG00000157514	TSC22D3	-1.82851	2.32453e-16	8.29635e-15
ENSG00000102466	FGF14	-1.82787	2.91654e-08	1.98705e-07
ENSG00000184719	RNLS	-1.82707	1.06103e-15	3.24374e-14
ENSG00000184702	2020-09-05	-1.82546	1.90203e-18	1.08323e-16
ENSG00000136002	ARHGEF4	-1.82431	2.5307e-08	1.74712e-07
ENSG00000050628	PTGER3	-1.81957	9.12698e-11	1.03668e-09
ENSG00000153823	PID1	-1.81938	1.83917e-13	3.5954e-12
ENSG00000153993	SEMA3D	-1.81686	7.85273e-08	4.92132e-07
ENSG00000162520	SYNC	-1.81162	1.37069e-09	1.23433e-08
ENSG00000164442	CITED2	-1.80769	8.22408e-32	4.57053e-29
ENSG00000271447	MMP28	-1.80359	3.01555e-12	4.62315e-11
ENSG00000159251	ACTC1	-1.80137	8.34119e-08	5.20229e-07
ENSG00000183134	PTGDR2	-1.80037	3.23358e-12	4.92346e-11
ENSG00000189058	APOD	-1.79807	4.40813e-05	0.000158089
ENSG00000242732	RTL5	-1.79686	8.01381e-15	2.02112e-13
ENSG00000103241	FOXF1	-1.79634	5.11134e-14	1.12183e-12
ENSG00000162444	RBP7	-1.79388	2.15189e-15	6.1329e-14
ENSG00000243244	STON1	-1.79357	3.02156e-12	4.6278e-11
ENSG00000181804	SLC9A9	-1.79162	7.95264e-20	6.06623e-18
ENSG00000092068	SLC7A8	-1.7894	3.18906e-16	1.0788e-14
ENSG00000131831	RAI2	-1.78731	1.24874e-14	3.05401e-13
ENSG00000174099	MSRB3	-1.783	1.54952e-10	1.67678e-09
ENSG00000138678	GPAT3	-1.78285	2.44676e-17	1.06056e-15
ENSG00000154655	L3MBTL4	-1.78192	3.35588e-11	4.15771e-10
ENSG00000169418	NPR1	-1.77746	6.45645e-19	4.0841e-17
ENSG00000100307	CBX7	-1.77625	3.57567e-23	4.88078e-21
ENSG00000048540	LMO3	-1.7761	1.88538e-08	1.33843e-07
ENSG00000118596	SLC16A7	-1.77459	4.47576e-14	9.92126e-13
ENSG00000197253	TPSB2	-1.76704	2.36775e-08	1.64632e-07
ENSG00000131668	BARX1	-1.76445	6.83391e-06	2.89367e-05
ENSG00000188171	ZNF626	-1.76224	2.72674e-14	6.30474e-13
ENSG00000163531	NFASC	-1.75953	2.31457e-09	1.97678e-08
ENSG00000149534	MS4A2	-1.75777	2.6646e-09	2.24493e-08
ENSG00000139144	PIK3C2G	-1.7559	0.00144318	0.00359951
ENSG00000182916	TCEAL7	-1.75544	2.46406e-13	4.69893e-12
ENSG00000100399	CHADL	-1.75421	9.51116e-18	4.47139e-16
ENSG00000125144	MT1G	-1.75402	2.25746e-06	1.06288e-05
ENSG00000174808	BTC	-1.75156	7.39835e-17	2.87058e-15
ENSG00000125355	TMEM255A	-1.75116	1.90057e-11	2.49366e-10
ENSG00000134198	TSPAN2	-1.75098	4.18215e-11	5.09619e-10
ENSG00000152217	SETBP1	-1.74947	1.50159e-12	2.4622e-11
ENSG00000150471	ADGRL3	-1.74734	1.41368e-10	1.53885e-09
ENSG00000198846	TOX	-1.74607	4.54551e-11	5.50129e-10
ENSG00000198932	GPRASP1	-1.74561	1.88612e-12	3.01955e-11
ENSG00000162461	SLC25A34	-1.74466	3.73444e-14	8.40978e-13
ENSG00000183111	ARHGEF37	-1.74343	1.54766e-22	1.81076e-20
ENSG00000187720	THSD4	-1.74236	2.12227e-13	4.10754e-12
ENSG00000163106	HPGDS	-1.74057	5.32939e-12	7.78692e-11
ENSG00000197245	FAM110D	-1.74036	1.87169e-17	8.32153e-16
ENSG00000128266	GNAZ	-1.73984	1.03238e-12	1.74618e-11
ENSG00000169071	ROR2	-1.73851	3.34165e-10	3.40756e-09
ENSG00000119508	NR4A3	-1.73795	9.44765e-11	1.06765e-09
ENSG00000137941	TTLL7	-1.73327	6.06876e-10	5.82219e-09
ENSG00000120693	SMAD9	-1.73189	2.2754e-11	2.92142e-10
ENSG00000104177	MYEF2	-1.73139	1.90794e-07	1.11072e-06
ENSG00000159176	CSRP1	-1.73051	3.2199e-13	5.96487e-12
ENSG00000161243	FBXO27	-1.73038	5.2332e-10	5.10557e-09
ENSG00000171951	SCG2	-1.73036	3.55619e-07	1.96164e-06
ENSG00000127083	OMD	-1.7277	1.26287e-05	5.08317e-05
ENSG00000137872	SEMA6D	-1.7276	1.80027e-12	2.89521e-11
ENSG00000135472	FAIM2	-1.72636	6.23892e-09	4.90323e-08
ENSG00000138166	DUSP5	-1.72615	1.16633e-15	3.54479e-14
ENSG00000102349	KLF8	-1.72347	1.90285e-15	5.51401e-14
ENSG00000011465	DCN	-1.722	1.04752e-10	1.17185e-09
ENSG00000165795	NDRG2	-1.72133	2.03179e-19	1.43062e-17
ENSG00000166592	RRAD	-1.72088	7.54078e-09	5.81189e-08
ENSG00000198121	LPAR1	-1.71738	1.70002e-17	7.60172e-16
ENSG00000156475	PPP2R2B	-1.70792	1.3796e-11	1.86678e-10
ENSG00000165995	CACNB2	-1.70683	5.15808e-12	7.56502e-11
ENSG00000197410	DCHS2	-1.70584	1.88251e-05	7.29063e-05
ENSG00000112320	SOBP	-1.7051	4.00779e-13	7.32845e-12
ENSG00000162595	DIRAS3	-1.70492	5.0023e-10	4.908e-09
ENSG00000106853	PTGR1	-1.70445	2.18282e-20	1.84603e-18
ENSG00000105270	CLIP3	-1.70316	1.62494e-12	2.64772e-11
ENSG00000126947	ARMCX1	-1.7004	4.73187e-17	1.93261e-15
ENSG00000078596	ITM2A	-1.69952	1.97419e-14	4.67585e-13
ENSG00000006747	SCIN	-1.69692	2.2819e-09	1.95102e-08
ENSG00000145824	CXCL14	-1.69571	3.66938e-05	0.000133659
ENSG00000069702	TGFBR3	-1.6949	1.94762e-12	3.10841e-11
ENSG00000163637	PRICKLE2	-1.69363	3.1121e-12	4.75244e-11
ENSG00000157150	TIMP4	-1.69325	3.78437e-09	3.10594e-08
ENSG00000166106	ADAMTS15	-1.69305	3.57606e-10	3.62521e-09
ENSG00000137727	ARHGAP20	-1.69141	3.19005e-12	4.86194e-11
ENSG00000099860	GADD45B	-1.69083	2.96214e-18	1.58944e-16
ENSG00000165410	CFL2	-1.69031	6.86196e-13	1.19573e-11
ENSG00000126878	AIF1L	-1.68983	5.95292e-11	7.0551e-10
ENSG00000090661	CERS4	-1.68747	4.94164e-11	5.94257e-10
ENSG00000119138	KLF9	-1.68588	7.22526e-16	2.29923e-14
ENSG00000114166	KAT2B	-1.68507	1.23065e-28	3.83004e-26
ENSG00000168243	GNG4	-1.68396	5.86398e-05	0.000204503
ENSG00000050767	COL23A1	-1.68278	2.84366e-14	6.51697e-13
ENSG00000105650	PDE4C	-1.68165	2.11807e-09	1.83515e-08
ENSG00000143603	KCNN3	-1.68154	1.83867e-16	6.70059e-15
ENSG00000155970	MICU3	-1.67855	5.98281e-13	1.05196e-11
ENSG00000118407	FILIP1	-1.67636	1.73266e-10	1.85689e-09
ENSG00000076555	ACACB	-1.675	1.0058e-16	3.78051e-15
ENSG00000262655	SPON1	-1.67406	1.44322e-06	7.1078e-06
ENSG00000082196	C1QTNF3	-1.67393	1.76867e-11	2.33835e-10
ENSG00000144868	TMEM108	-1.67135	2.72799e-16	9.49845e-15
ENSG00000063180	CA11	-1.67039	1.5436e-23	2.26604e-21
ENSG00000107796	ACTA2	-1.66839	4.97657e-08	3.25107e-07
ENSG00000131435	PDLIM4	-1.66835	7.09615e-14	1.51472e-12
ENSG00000147852	VLDLR	-1.66749	1.05864e-11	1.46431e-10
ENSG00000171033	PKIA	-1.66742	4.66015e-11	5.62144e-10
ENSG00000104936	DMPK	-1.66545	2.81526e-14	6.48051e-13
ENSG00000162614	NEXN	-1.66457	6.5074e-09	5.09878e-08
ENSG00000003096	KLHL13	-1.66371	3.60887e-08	2.40504e-07
ENSG00000259330	INAFM2	-1.66285	2.99344e-20	2.4646e-18
ENSG00000187068	C3orf70	-1.65991	1.64929e-09	1.46154e-08
ENSG00000127528	KLF2	-1.65983	8.7768e-12	1.23934e-10
ENSG00000166250	CLMP	-1.65853	6.63322e-10	6.31313e-09
ENSG00000100739	BDKRB1	-1.65117	5.83514e-14	1.26816e-12
ENSG00000099864	PALM	-1.6507	1.93596e-11	2.53369e-10
ENSG00000088543	C3orf18	-1.64987	8.20948e-19	5.08955e-17
ENSG00000103647	CORO2B	-1.64981	6.24247e-12	9.0278e-11
ENSG00000163751	CPA3	-1.64975	2.85366e-08	1.94763e-07
ENSG00000187479	C11orf96	-1.64855	7.16135e-11	8.39773e-10
ENSG00000166173	LARP6	-1.64269	1.20042e-12	2.00211e-11
ENSG00000167074	TEF	-1.63976	4.12956e-26	9.05071e-24
ENSG00000178573	MAF	-1.63827	2.37118e-18	1.30844e-16
ENSG00000079308	TNS1	-1.63275	1.30481e-07	7.81733e-07
ENSG00000151778	SERP2	-1.63189	2.39902e-10	2.5105e-09
ENSG00000198934	MAGEE1	-1.63075	8.36053e-11	9.58013e-10
ENSG00000103175	WFDC1	-1.63001	3.5557e-13	6.55572e-12
ENSG00000174080	CTSF	-1.62792	5.36472e-13	9.54592e-12
ENSG00000236609	ZNF853	-1.62781	5.48441e-11	6.5447e-10
ENSG00000109107	ALDOC	-1.62713	7.98149e-19	4.98795e-17
ENSG00000114771	AADAC	-1.62545	0.000645169	0.00175209
ENSG00000101400	SNTA1	-1.62415	8.91017e-18	4.22717e-16
ENSG00000115041	KCNIP3	-1.62286	1.42376e-09	1.27769e-08
ENSG00000163827	LRRC2	-1.62185	1.30685e-08	9.54735e-08
ENSG00000064655	EYA2	-1.62164	3.12817e-05	0.000115569
ENSG00000150281	CTF1	-1.62136	2.19185e-09	1.88856e-08
ENSG00000094963	FMO2	-1.62131	4.76749e-06	2.0886e-05
ENSG00000152583	SPARCL1	-1.62072	6.62717e-08	4.2092e-07
ENSG00000077157	PPP1R12B	-1.61892	3.77193e-07	2.06745e-06
ENSG00000144655	CSRNP1	-1.61719	5.29003e-23	6.80315e-21
ENSG00000157168	NRG1	-1.61667	2.08398e-06	9.8838e-06
ENSG00000163220	S100A9	-1.61465	6.12479e-05	0.000212646
ENSG00000175984	DENND2C	-1.61464	1.24606e-11	1.70088e-10
ENSG00000077063	CTTNBP2	-1.61279	7.2906e-09	5.63022e-08
ENSG00000166501	PRKCB	-1.61277	2.93919e-09	2.455e-08
ENSG00000138135	CH25H	-1.60976	1.12477e-09	1.02654e-08
ENSG00000183690	EFHC2	-1.60926	2.24263e-08	1.56702e-07
ENSG00000105426	PTPRS	-1.60617	6.06874e-10	5.82219e-09
ENSG00000184515	BEX5	-1.60315	1.30772e-05	5.25092e-05
ENSG00000196542	SPTSSB	-1.60299	6.71241e-05	0.000231447
ENSG00000187824	TMEM220	-1.60268	2.45985e-17	1.06327e-15
ENSG00000133687	TMTC1	-1.60121	1.13096e-10	1.25616e-09
ENSG00000150764	DIXDC1	-1.60027	5.53603e-14	1.20992e-12
ENSG00000132561	MATN2	-1.60011	2.38447e-08	1.65572e-07
ENSG00000111452	ADGRD1	-1.59921	1.07963e-07	6.57022e-07
ENSG00000144451	SPAG16	-1.59597	5.03092e-12	7.39245e-11
ENSG00000068831	RASGRP2	-1.59575	3.90885e-11	4.79319e-10
ENSG00000071205	ARHGAP10	-1.59495	1.95755e-17	8.60493e-16
ENSG00000121898	CPXM2	-1.59349	6.20371e-07	3.27463e-06
ENSG00000176049	JAKMIP2	-1.58919	5.69586e-10	5.50518e-09
ENSG00000167741	GGT6	-1.58515	0.001114	0.00285254
ENSG00000242515	UGT1A10	-1.58248	0.00381954	0.00855917
ENSG00000109794	FAM149A	-1.58236	2.06431e-11	2.68585e-10
ENSG00000160191	PDE9A	-1.58233	1.08055e-09	9.88506e-09
ENSG00000112186	CAP2	-1.58082	2.04246e-09	1.77855e-08
ENSG00000111907	TPD52L1	-1.5804	1.78945e-07	1.04722e-06
ENSG00000130558	OLFM1	-1.57776	2.46969e-10	2.57752e-09
ENSG00000176293	ZNF135	-1.5775	1.85017e-11	2.43987e-10
ENSG00000130234	ACE2	-1.57663	0.000249508	0.000749102
ENSG00000104267	CA2	-1.57456	0.000421413	0.0011936
ENSG00000166313	APBB1	-1.57366	1.20646e-13	2.44768e-12
ENSG00000171408	PDE7B	-1.5677	8.45479e-10	7.87354e-09
ENSG00000117016	RIMS3	-1.5664	1.66712e-11	2.21917e-10
ENSG00000164197	RNF180	-1.56532	9.00747e-12	1.26617e-10
ENSG00000160233	LRRC3	-1.5595	4.57862e-15	1.21989e-13
ENSG00000149090	PAMR1	-1.5594	1.50055e-15	4.46463e-14
ENSG00000152953	STK32B	-1.55899	4.07166e-12	6.08637e-11
ENSG00000188906	LRRK2	-1.55839	9.18709e-11	1.04275e-09
ENSG00000106123	EPHB6	-1.55717	7.37031e-09	5.68839e-08
ENSG00000157152	SYN2	-1.55554	8.30916e-06	3.46739e-05
ENSG00000133116	KL	-1.55339	8.29994e-11	9.52474e-10
ENSG00000167701	GPT	-1.55123	4.88795e-07	2.62824e-06
ENSG00000135773	CAPN9	-1.55085	0.000689505	0.00186209
ENSG00000125148	MT2A	-1.54916	3.12554e-11	3.89403e-10
ENSG00000158270	COLEC12	-1.54904	4.19174e-09	3.40259e-08
ENSG00000174136	RGMB	-1.54901	5.11579e-19	3.33083e-17
ENSG00000073711	PPP2R3A	-1.54843	4.96702e-15	1.31225e-13
ENSG00000196867	ZFP28	-1.5473	5.54146e-11	6.60266e-10
ENSG00000151623	NR3C2	-1.54631	1.31221e-12	2.16924e-11
ENSG00000163629	PTPN13	-1.54291	1.48371e-10	1.61116e-09
ENSG00000196557	CACNA1H	-1.54218	6.07437e-08	3.88027e-07
ENSG00000147255	IGSF1	-1.53988	0.00015581	0.000491497
ENSG00000198832	SELENOM	-1.53828	5.42637e-11	6.48041e-10
ENSG00000118526	TCF21	-1.53751	4.45175e-13	8.05507e-12
ENSG00000123360	PDE1B	-1.53609	3.69174e-11	4.54128e-10
ENSG00000164736	SOX17	-1.53604	8.51653e-15	2.14443e-13
ENSG00000138061	CYP1B1	-1.53273	1.19353e-05	4.8303e-05
ENSG00000138606	SHF	-1.52998	3.48363e-12	5.26299e-11
ENSG00000173947	PIFO	-1.52691	5.71312e-05	0.000199734
ENSG00000140961	OSGIN1	-1.52686	7.41581e-17	2.87058e-15
ENSG00000124785	NRN1	-1.52457	9.15034e-10	8.45537e-09
ENSG00000166780	C16orf45	-1.52445	1.13625e-13	2.32342e-12
ENSG00000129682	FGF13	-1.52427	5.53343e-08	3.56989e-07
ENSG00000171119	NRTN	-1.52345	5.70098e-09	4.50319e-08
ENSG00000066629	EML1	-1.5216	6.08017e-11	7.19494e-10
ENSG00000118985	ELL2	-1.52138	7.58877e-22	8.20062e-20
ENSG00000163075	CFAP221	-1.52068	0.000318229	0.000931696
ENSG00000168490	PHYHIP	-1.52061	6.40723e-10	6.13556e-09
ENSG00000221890	NPTXR	-1.52025	6.50853e-07	3.42159e-06
ENSG00000115457	IGFBP2	-1.51676	3.0218e-05	0.000112011
ENSG00000173376	NDNF	-1.51638	6.23289e-06	2.65766e-05
ENSG00000150054	MPP7	-1.51597	2.05299e-10	2.17324e-09
ENSG00000112425	EPM2A	-1.51568	9.34569e-19	5.68079e-17
ENSG00000233608	TWIST2	-1.51435	2.62233e-08	1.80638e-07
ENSG00000072952	MRVI1	-1.5125	2.64391e-08	1.81802e-07
ENSG00000128016	ZFP36	-1.51048	3.89852e-14	8.73368e-13
ENSG00000148541	FAM13C	-1.50746	2.64951e-11	3.34923e-10
ENSG00000165457	FOLR2	-1.50628	4.40204e-09	3.5603e-08
ENSG00000140416	TPM1	-1.50555	1.3186e-11	1.79365e-10
ENSG00000140254	DUOXA1	-1.50484	0.000162468	0.000510327
ENSG00000158560	DYNC1I1	-1.50316	7.53408e-07	3.91054e-06
ENSG00000115556	PLCD4	-1.50275	1.73849e-18	1.00195e-16
ENSG00000158828	PINK1	-1.50089	6.7918e-29	2.15688e-26
ENSG00000169946	ZFPM2	-1.50072	2.34437e-09	2.00004e-08
ENSG00000082397	EPB41L3	-1.49687	2.67762e-13	5.06276e-12
ENSG00000179954	SSC5D	-1.4945	3.8532e-07	2.10755e-06
ENSG00000265972	TXNIP	-1.49235	5.90969e-12	8.57043e-11
ENSG00000118777	ABCG2	-1.48925	1.69373e-08	1.21178e-07
ENSG00000154917	RAB6B	-1.48833	1.89613e-12	3.03245e-11
ENSG00000115295	CLIP4	-1.48649	1.14882e-11	1.57922e-10
ENSG00000100234	TIMP3	-1.48545	6.80092e-09	5.2941e-08
ENSG00000005243	COPZ2	-1.48189	4.78281e-12	7.05454e-11
ENSG00000278318	ZNF229	-1.48096	4.85913e-07	2.61637e-06
ENSG00000257335	MGAM	-1.4807	5.58036e-05	0.000195665
ENSG00000048740	CELF2	-1.47995	7.47503e-10	7.06676e-09
ENSG00000187391	MAGI2	-1.4788	2.07053e-12	3.28101e-11
ENSG00000133019	CHRM3	-1.4773	5.92475e-06	2.54051e-05
ENSG00000143382	ADAMTSL4	-1.47569	1.33241e-11	1.80829e-10
ENSG00000065833	ME1	-1.4738	1.60233e-13	3.1522e-12
ENSG00000184347	SLIT3	-1.47331	3.87579e-08	2.5719e-07
ENSG00000183963	SMTN	-1.47314	3.27047e-09	2.70989e-08
ENSG00000203778	FAM229B	-1.47241	2.61876e-12	4.05675e-11
ENSG00000173698	ADGRG2	-1.47172	2.99616e-08	2.03656e-07
ENSG00000167772	ANGPTL4	-1.47075	8.33347e-10	7.77441e-09
ENSG00000173320	STOX2	-1.46905	1.10966e-08	8.23443e-08
ENSG00000121104	FAM117A	-1.46866	1.40926e-17	6.41213e-16
ENSG00000108852	MPP2	-1.46781	6.78537e-09	5.28464e-08
ENSG00000109610	SOD3	-1.46754	9.19444e-08	5.66857e-07
ENSG00000165272	AQP3	-1.46732	7.81448e-06	3.27766e-05
ENSG00000099866	MADCAM1	-1.45989	6.76985e-06	2.86733e-05
ENSG00000180354	MTURN	-1.45905	2.28255e-14	5.36537e-13
ENSG00000175426	PCSK1	-1.45731	1.85603e-05	7.20422e-05
ENSG00000119865	CNRIP1	-1.45592	1.69165e-16	6.19382e-15
ENSG00000169122	FAM110B	-1.4558	1.22351e-09	1.1108e-08
ENSG00000177432	NAP1L5	-1.45509	5.48188e-15	1.4241e-13
ENSG00000111962	UST	-1.45477	5.14574e-08	3.34055e-07
ENSG00000176171	BNIP3	-1.45415	4.5464e-11	5.50129e-10
ENSG00000186472	PCLO	-1.45394	0.00149382	0.00370799
ENSG00000148053	NTRK2	-1.45358	3.93039e-05	0.000142466
ENSG00000151789	ZNF385D	-1.45255	4.94417e-07	2.65572e-06
ENSG00000105974	CAV1	-1.45211	1.78511e-09	1.57383e-08
ENSG00000148357	HMCN2	-1.4516	3.73296e-07	2.04898e-06
ENSG00000153162	BMP6	-1.45025	1.31377e-09	1.18651e-08
ENSG00000124942	AHNAK	-1.44922	4.49146e-14	9.94191e-13
ENSG00000038295	TLL1	-1.4486	3.20037e-08	2.1622e-07
ENSG00000171385	KCND3	-1.44836	7.91201e-08	4.95249e-07
ENSG00000154856	APCDD1	-1.44808	2.04336e-07	1.18556e-06
ENSG00000137033	IL33	-1.44596	1.948e-06	9.30877e-06
ENSG00000185630	PBX1	-1.44593	2.10508e-11	2.72977e-10
ENSG00000170577	SIX2	-1.44536	0.00138172	0.0034623
ENSG00000101298	SNPH	-1.44469	2.13232e-10	2.24804e-09
ENSG00000143416	SELENBP1	-1.44288	3.05445e-10	3.13525e-09
ENSG00000133104	SPART	-1.44287	7.95197e-12	1.13212e-10
ENSG00000188227	ZNF793	-1.44246	6.82317e-08	4.31958e-07
ENSG00000170345	FOS	-1.44187	7.81855e-08	4.90187e-07
ENSG00000173198	CYSLTR1	-1.44156	1.39376e-10	1.51985e-09
ENSG00000183833	MAATS1	-1.4412	0.0001053	0.000347672
ENSG00000122707	RECK	-1.44092	1.15989e-14	2.85585e-13
ENSG00000140682	TGFB1I1	-1.44019	5.47257e-10	5.30584e-09
ENSG00000153253	SCN3A	-1.4387	9.17144e-08	5.66006e-07
ENSG00000049246	PER3	-1.43851	2.57338e-12	3.99245e-11
ENSG00000154065	ANKRD29	-1.43828	3.42529e-08	2.29647e-07
ENSG00000105290	APLP1	-1.43771	1.90719e-06	9.12881e-06
ENSG00000164236	ANKRD33B	-1.43625	1.38824e-09	1.24797e-08
ENSG00000143995	MEIS1	-1.43543	1.20965e-10	1.33215e-09
ENSG00000184451	CCR10	-1.43112	3.62493e-11	4.46262e-10
ENSG00000105609	LILRB5	-1.43079	2.16107e-09	1.8641e-08
ENSG00000159884	CCDC107	-1.42693	3.88091e-20	3.16183e-18
ENSG00000132970	WASF3	-1.42581	3.82198e-07	2.09194e-06
ENSG00000132821	VSTM2L	-1.42552	0.00024866	0.000746987
ENSG00000154262	ABCA6	-1.4255	4.14203e-08	2.73691e-07
ENSG00000130844	ZNF331	-1.42058	1.58453e-10	1.71109e-09
ENSG00000241978	AKAP2	-1.41964	9.82693e-11	1.10489e-09
ENSG00000241644	INMT	-1.41933	3.11856e-07	1.73935e-06
ENSG00000121577	POPDC2	-1.41844	3.28525e-06	1.49261e-05
ENSG00000125968	ID1	-1.4184	2.51825e-09	2.13667e-08
ENSG00000088538	DOCK3	-1.41722	2.10726e-06	9.97601e-06
ENSG00000077274	CAPN6	-1.41677	0.0022115	0.0052781
ENSG00000239697	TNFSF12	-1.41473	8.54279e-17	3.25023e-15
ENSG00000197928	ZNF677	-1.41122	1.96915e-10	2.09589e-09
ENSG00000163412	EIF4E3	-1.41093	7.81241e-18	3.74058e-16
ENSG00000036448	MYOM2	-1.4109	1.1395e-10	1.26295e-09
ENSG00000137193	PIM1	-1.41022	2.34487e-18	1.30316e-16
ENSG00000108405	P2RX1	-1.40999	3.46367e-08	2.3202e-07
ENSG00000135424	ITGA7	-1.40957	2.53344e-08	1.74824e-07
ENSG00000171724	VAT1L	-1.40931	3.00267e-08	2.03948e-07
ENSG00000198695	MT-ND6	-1.40632	6.25811e-13	1.09789e-11
ENSG00000073737	DHRS9	-1.40383	0.000174517	0.000543677
ENSG00000164106	SCRG1	-1.40358	0.00185846	0.00451725
ENSG00000099960	SLC7A4	-1.40354	0.00163781	0.00403004
ENSG00000160408	ST6GALNAC6	-1.40338	5.97414e-21	5.43647e-19
ENSG00000165125	TRPV6	-1.40294	0.00147933	0.00367671
ENSG00000160539	PLPP7	-1.39973	3.92802e-09	3.20692e-08
ENSG00000145990	GFOD1	-1.39973	1.81699e-12	2.91787e-11
ENSG00000196924	FLNA	-1.39964	3.01924e-06	1.38346e-05
ENSG00000183580	FBXL7	-1.3996	1.77135e-12	2.85638e-11
ENSG00000187091	PLCD1	-1.39942	3.19521e-23	4.40006e-21
ENSG00000197852	FAM212B	-1.39813	4.03054e-17	1.69512e-15
ENSG00000143878	RHOB	-1.39627	8.1859e-11	9.42165e-10
ENSG00000169860	P2RY1	-1.39593	1.03693e-09	9.50278e-09
ENSG00000188549	C15orf52	-1.39334	3.46678e-08	2.32128e-07
ENSG00000129757	CDKN1C	-1.39158	3.89242e-09	3.18286e-08
ENSG00000107130	NCS1	-1.39054	1.41185e-07	8.39826e-07
ENSG00000158481	CD1C	-1.3889	1.12423e-05	4.57722e-05
ENSG00000131016	AKAP12	-1.38832	3.86153e-06	1.72819e-05
ENSG00000185274	GALNT17	-1.38715	3.79224e-07	2.07639e-06
ENSG00000163959	SLC51A	-1.38687	3.34009e-12	5.0757e-11
ENSG00000129993	CBFA2T3	-1.38618	5.52064e-09	4.37407e-08
ENSG00000134532	SOX5	-1.37664	6.58214e-10	6.27602e-09
ENSG00000145335	SNCA	-1.37525	3.08131e-08	2.08652e-07
ENSG00000171596	NMUR1	-1.37469	6.88633e-09	5.35256e-08
ENSG00000127955	GNAI1	-1.37267	3.72793e-12	5.61028e-11
ENSG00000124762	CDKN1A	-1.36939	5.55433e-14	1.21222e-12
ENSG00000162998	FRZB	-1.3686	1.64909e-06	7.99985e-06
ENSG00000198680	TUSC1	-1.36687	2.32207e-13	4.45544e-12
ENSG00000170954	ZNF415	-1.36676	9.24145e-09	6.98553e-08
ENSG00000168734	PKIG	-1.36564	1.00718e-14	2.50765e-13
ENSG00000137070	IL11RA	-1.36494	2.88291e-19	1.98258e-17
ENSG00000130055	GDPD2	-1.36465	0.000141164	0.000450385
ENSG00000197256	KANK2	-1.36424	9.26812e-11	1.05041e-09
ENSG00000102003	SYP	-1.36377	7.05678e-08	4.46022e-07
ENSG00000152284	TCF7L1	-1.36298	2.14008e-12	3.37063e-11
ENSG00000135205	CCDC146	-1.36222	1.27382e-12	2.11321e-11
ENSG00000196507	TCEAL3	-1.36027	2.71943e-13	5.10481e-12
ENSG00000127249	ATP13A4	-1.36017	0.00170237	0.00417109
ENSG00000151090	THRB	-1.35852	1.4491e-06	7.12914e-06
ENSG00000166206	GABRB3	-1.3566	0.00221509	0.00528424
ENSG00000111846	GCNT2	-1.35544	3.39931e-10	3.45955e-09
ENSG00000144115	THNSL2	-1.35357	2.07653e-05	7.9608e-05
ENSG00000108242	CYP2C18	-1.35163	0.000739389	0.00197589
ENSG00000143867	OSR1	-1.34867	1.20854e-06	6.05283e-06
ENSG00000064309	CDON	-1.34749	1.70013e-07	1.00211e-06
ENSG00000139970	RTN1	-1.347	1.18022e-07	7.1294e-07
ENSG00000113749	HRH2	-1.34528	6.91088e-09	5.36896e-08
ENSG00000147041	SYTL5	-1.34453	0.0009782	0.00253739
ENSG00000119866	BCL11A	-1.34348	1.6931e-05	6.64807e-05
ENSG00000080561	MID2	-1.3433	7.81168e-10	7.336e-09
ENSG00000107902	LHPP	-1.34127	6.53695e-20	5.11163e-18
ENSG00000122574	WIPF3	-1.33987	4.92685e-06	2.15296e-05
ENSG00000263429	LINC00675	-1.33955	0.00123062	0.00312138
ENSG00000164342	TLR3	-1.33883	2.06733e-11	2.68753e-10
ENSG00000154188	ANGPT1	-1.33785	2.69391e-10	2.79467e-09
ENSG00000198753	PLXNB3	-1.33762	0.000105545	0.000348332
ENSG00000189320	FAM180A	-1.33477	5.40749e-05	0.000190031
ENSG00000234465	PINLYP	-1.33455	2.43312e-11	3.10852e-10
ENSG00000162383	SLC1A7	-1.33314	3.03078e-05	0.000112264
ENSG00000134531	EMP1	-1.33242	1.33506e-08	9.73519e-08
ENSG00000212747	RTL8B	-1.33165	5.80089e-12	8.42835e-11
ENSG00000100139	MICALL1	-1.33089	7.38363e-21	6.50249e-19
ENSG00000139112	GABARAPL1	-1.33041	7.41008e-15	1.88412e-13
ENSG00000048342	CC2D2A	-1.32985	2.08119e-13	4.03304e-12
ENSG00000160712	IL6R	-1.32835	4.4458e-13	8.05367e-12
ENSG00000186204	CYP4F12	-1.32802	3.51987e-05	0.000128665
ENSG00000187239	FNBP1	-1.3272	1.25494e-08	9.2027e-08
ENSG00000106829	TLE4	-1.32545	9.53231e-17	3.6003e-15
ENSG00000100417	PMM1	-1.32393	2.99004e-22	3.3716e-20
ENSG00000130222	GADD45G	-1.32326	3.0777e-11	3.84367e-10
ENSG00000152932	RAB3C	-1.32212	0.000323346	0.0009449
ENSG00000025423	HSD17B6	-1.32123	1.26138e-10	1.38423e-09
ENSG00000122035	RASL11A	-1.3193	2.29153e-08	1.59832e-07
ENSG00000143028	SYPL2	-1.31863	2.68045e-06	1.24398e-05
ENSG00000263961	C1orf186	-1.31728	3.14526e-05	0.000116145
ENSG00000104490	NCALD	-1.3155	1.04669e-11	1.45037e-10
ENSG00000184205	TSPYL2	-1.31499	2.74989e-15	7.62762e-14
ENSG00000143819	EPHX1	-1.3147	7.39519e-17	2.87058e-15
ENSG00000102886	GDPD3	-1.31347	2.29936e-08	1.60306e-07
ENSG00000099284	H2AFY2	-1.31301	7.6544e-08	4.80089e-07
ENSG00000134874	DZIP1	-1.31297	2.09725e-09	1.82015e-08
ENSG00000171444	MCC	-1.31255	2.84009e-11	3.58141e-10
ENSG00000174514	MFSD4A	-1.3105	4.45074e-05	0.00015947
ENSG00000116678	LEPR	-1.30991	1.15614e-09	1.05394e-08
ENSG00000138696	BMPR1B	-1.30908	0.000622484	0.00169555
ENSG00000174348	PODN	-1.30833	1.39737e-05	5.5798e-05
ENSG00000180190	TDRP	-1.30829	6.34841e-09	4.97671e-08
ENSG00000164849	GPR146	-1.30801	9.12749e-14	1.89884e-12
ENSG00000189369	GSPT2	-1.30723	5.09092e-08	3.31333e-07
ENSG00000120915	EPHX2	-1.30631	1.90084e-09	1.66455e-08
ENSG00000176014	TUBB6	-1.30598	4.75026e-10	4.6873e-09
ENSG00000107736	CDH23	-1.30554	1.40726e-08	1.02138e-07
ENSG00000187699	C2orf88	-1.30473	3.78721e-09	3.10663e-08
ENSG00000197016	ZNF470	-1.30423	2.41066e-07	1.37508e-06
ENSG00000115896	PLCL1	-1.30418	8.73261e-11	9.97703e-10
ENSG00000073712	FERMT2	-1.30406	9.26299e-08	5.70428e-07
ENSG00000170464	DNAJC18	-1.30255	1.54801e-16	5.69468e-15
ENSG00000171791	BCL2	-1.30216	1.14269e-12	1.91817e-11
ENSG00000188738	FSIP2	-1.30137	9.76034e-05	0.000323977
ENSG00000186352	ANKRD37	-1.30133	8.13364e-13	1.40008e-11
ENSG00000010361	FUZ	-1.30072	6.28615e-09	4.93536e-08
ENSG00000165424	ZCCHC24	-1.30003	7.51754e-08	4.72839e-07
ENSG00000082014	SMARCD3	-1.29736	2.11056e-12	3.33087e-11
ENSG00000121653	MAPK8IP1	-1.29716	5.02719e-08	3.28e-07
ENSG00000090006	LTBP4	-1.29476	7.22376e-12	1.03603e-10
ENSG00000137267	TUBB2A	-1.29308	7.88864e-15	1.99278e-13
ENSG00000115252	PDE1A	-1.29172	1.93454e-09	1.69025e-08
ENSG00000170899	GSTA4	-1.29167	2.48259e-11	3.16134e-10
ENSG00000007402	CACNA2D2	-1.29143	9.25084e-08	5.70108e-07
ENSG00000079156	OSBPL6	-1.2891	6.28606e-08	4.00891e-07
ENSG00000111186	WNT5B	-1.28899	1.36766e-08	9.94957e-08
ENSG00000105996	HOXA2	-1.28866	4.2402e-07	2.30948e-06
ENSG00000109738	GLRB	-1.28859	3.56639e-06	1.60673e-05
ENSG00000078804	TP53INP2	-1.28794	5.3544e-13	9.54592e-12
ENSG00000173581	CCDC106	-1.28771	6.48392e-10	6.18995e-09
ENSG00000116774	OLFML3	-1.28653	2.71446e-08	1.85833e-07
ENSG00000171503	ETFDH	-1.28517	8.40077e-24	1.33392e-21
ENSG00000133401	PDZD2	-1.28305	3.34007e-10	3.40756e-09
ENSG00000165124	SVEP1	-1.28277	9.76005e-07	4.97302e-06
ENSG00000254122	PCDHGB7	-1.28152	3.11546e-09	2.58973e-08
ENSG00000184613	NELL2	-1.2815	1.15848e-05	4.70435e-05
ENSG00000120738	EGR1	-1.2815	6.58839e-07	3.46241e-06
ENSG00000160460	SPTBN4	-1.28149	1.83124e-05	7.1204e-05
ENSG00000147027	TMEM47	-1.28146	1.39004e-08	1.00935e-07
ENSG00000146938	NLGN4X	-1.27614	5.24213e-05	0.000184679
ENSG00000096060	FKBP5	-1.27536	2.52011e-10	2.62662e-09
ENSG00000176771	NCKAP5	-1.27448	1.36638e-08	9.9449e-08
ENSG00000106571	GLI3	-1.27419	6.71772e-08	4.25976e-07
ENSG00000146233	CYP39A1	-1.27406	3.44881e-06	1.55918e-05
ENSG00000184058	TBX1	-1.27359	1.67796e-05	6.59527e-05
ENSG00000092841	MYL6	-1.27352	3.1433e-21	3.01931e-19
ENSG00000115226	FNDC4	-1.27019	2.5662e-09	2.17074e-08
ENSG00000134463	ECHDC3	-1.26755	0.00030234	0.00088852
ENSG00000177191	B3GNT8	-1.26731	2.67351e-07	1.51172e-06
ENSG00000119711	ALDH6A1	-1.2666	4.30795e-23	5.72957e-21
ENSG00000067836	ROGDI	-1.26509	6.17557e-27	1.46669e-24
ENSG00000166333	ILK	-1.26462	1.72143e-17	7.67543e-16
ENSG00000150995	ITPR1	-1.26347	2.37715e-11	3.04201e-10
ENSG00000143248	RGS5	-1.26297	5.47915e-08	3.54074e-07
ENSG00000166257	SCN3B	-1.26288	1.18647e-05	4.80422e-05
ENSG00000240184	PCDHGC3	-1.26243	5.11333e-09	4.08687e-08
ENSG00000156968	MPV17L	-1.26223	0.000274879	0.000816142
ENSG00000112214	FHL5	-1.2622	1.04761e-08	7.82097e-08
ENSG00000156050	FAM161B	-1.26081	3.01412e-22	3.37429e-20
ENSG00000142583	SLC2A5	-1.25935	7.95534e-07	4.10591e-06
ENSG00000221869	CEBPD	-1.25883	2.4236e-12	3.77514e-11
ENSG00000130830	MPP1	-1.25836	2.10154e-11	2.72745e-10
ENSG00000126759	CFP	-1.25803	1.73945e-10	1.86287e-09
ENSG00000153707	PTPRD	-1.25762	4.8303e-06	2.11552e-05
ENSG00000023902	PLEKHO1	-1.25711	6.87377e-10	6.51814e-09
ENSG00000170390	DCLK2	-1.25642	2.15091e-07	1.24332e-06
ENSG00000197321	SVIL	-1.25626	8.60328e-07	4.41251e-06
ENSG00000185567	AHNAK2	-1.25553	0.000815483	0.00215372
ENSG00000204219	TCEA3	-1.25527	1.63126e-06	7.92015e-06
ENSG00000175745	NR2F1	-1.25403	4.37784e-07	2.37927e-06
ENSG00000158258	CLSTN2	-1.25383	1.22217e-06	6.11322e-06
ENSG00000166086	JAM3	-1.25319	1.76752e-09	1.56009e-08
ENSG00000112293	GPLD1	-1.25313	1.861e-09	1.63333e-08
ENSG00000130518	KIAA1683	-1.2508	1.12478e-08	8.33461e-08
ENSG00000144668	ITGA9	-1.25038	8.66889e-08	5.37437e-07
ENSG00000198515	CNGA1	-1.24935	1.10816e-06	5.5806e-06
ENSG00000117013	KCNQ4	-1.2488	8.91582e-06	3.69281e-05
ENSG00000178498	DTX3	-1.247	9.23325e-09	6.98486e-08
ENSG00000187601	MAGEH1	-1.24695	3.93864e-12	5.90447e-11
ENSG00000163644	PPM1K	-1.24681	5.05792e-15	1.334e-13
ENSG00000171223	JUNB	-1.24562	2.48148e-12	3.85758e-11
ENSG00000137502	RAB30	-1.2426	8.56498e-17	3.25072e-15
ENSG00000204314	PRRT1	-1.24234	1.88746e-11	2.47954e-10
ENSG00000198453	ZNF568	-1.24224	3.58267e-09	2.95286e-08
ENSG00000122694	GLIPR2	-1.24202	1.08921e-11	1.50125e-10
ENSG00000119950	MXI1	-1.24147	9.18975e-19	5.65224e-17
ENSG00000172508	CARNS1	-1.24125	3.24567e-06	1.47635e-05
ENSG00000112139	MDGA1	-1.24121	4.10788e-08	2.71665e-07
ENSG00000130032	PRRG3	-1.24019	6.95216e-06	2.93895e-05
ENSG00000185909	KLHDC8B	-1.23979	4.21221e-15	1.13011e-13
ENSG00000146373	RNF217	-1.23646	3.81971e-09	3.12835e-08
ENSG00000174175	SELP	-1.23628	9.02897e-05	0.000302345
ENSG00000120833	SOCS2	-1.2357	1.14607e-13	2.33429e-12
ENSG00000179761	PIPOX	-1.23529	2.67841e-05	0.000100503
ENSG00000069011	PITX1	-1.2348	7.30957e-08	4.60503e-07
ENSG00000276547	PCDHGB5	-1.23409	2.00064e-06	9.5263e-06
ENSG00000142227	EMP3	-1.23395	7.80741e-11	9.08005e-10
ENSG00000140044	JDP2	-1.23303	5.4797e-21	5.07557e-19
ENSG00000162433	AK4	-1.23201	8.17763e-06	3.41984e-05
ENSG00000196569	LAMA2	-1.23022	9.4135e-07	4.80747e-06
ENSG00000150051	MKX	-1.22969	0.000478278	0.00133761
ENSG00000149557	FEZ1	-1.22787	1.16771e-09	1.06386e-08
ENSG00000141447	OSBPL1A	-1.22736	4.26913e-11	5.18595e-10
ENSG00000173208	ABCD2	-1.22647	1.57794e-05	6.23049e-05
ENSG00000114654	EFCC1	-1.22598	1.12279e-09	1.02534e-08
ENSG00000143772	ITPKB	-1.22473	1.14755e-09	1.04672e-08
ENSG00000126091	ST3GAL3	-1.22117	8.73562e-16	2.70787e-14
ENSG00000179388	EGR3	-1.22051	1.0873e-06	5.48264e-06
ENSG00000175662	TOM1L2	-1.21985	4.24466e-17	1.77557e-15
ENSG00000127990	SGCE	-1.21736	6.48635e-08	4.12481e-07
ENSG00000172831	CES2	-1.21568	7.21095e-06	3.03926e-05
ENSG00000181035	SLC25A42	-1.21405	1.75193e-22	2.01877e-20
ENSG00000109099	PMP22	-1.21231	3.86409e-10	3.8818e-09
ENSG00000145020	AMT	-1.21157	3.25626e-11	4.04395e-10
ENSG00000165071	TMEM71	-1.2114	5.75061e-08	3.69316e-07
ENSG00000172465	TCEAL1	-1.2112	1.95122e-15	5.64368e-14
ENSG00000184271	POU6F1	-1.209	5.76456e-12	8.39124e-11
ENSG00000144476	ACKR3	-1.20862	8.9619e-12	1.26205e-10
ENSG00000144199	FAHD2B	-1.20656	2.50233e-13	4.76024e-12
ENSG00000184785	SMIM10	-1.20535	2.46859e-07	1.40504e-06
ENSG00000106236	NPTX2	-1.2051	0.000133451	0.000428524
ENSG00000197951	ZNF71	-1.20417	5.751e-09	4.5358e-08
ENSG00000134202	GSTM3	-1.20394	6.9413e-06	2.93595e-05
ENSG00000143409	MINDY1	-1.20304	2.78123e-18	1.50797e-16
ENSG00000159433	STARD9	-1.20124	4.60557e-08	3.02011e-07
ENSG00000185869	ZNF829	-1.20098	7.2159e-08	4.55154e-07
ENSG00000215018	COL28A1	-1.1986	6.1551e-05	0.000213603
ENSG00000183044	ABAT	-1.19833	2.70917e-08	1.85552e-07
ENSG00000137285	TUBB2B	-1.19699	0.00010934	0.000358955
ENSG00000185483	ROR1	-1.19654	1.73691e-08	1.23811e-07
ENSG00000173578	XCR1	-1.19621	0.000347816	0.00101034
ENSG00000186310	NAP1L3	-1.19607	2.02499e-05	7.77664e-05
ENSG00000111077	TNS2	-1.19565	1.89204e-10	2.01796e-09
ENSG00000182534	MXRA7	-1.19451	5.41134e-08	3.49983e-07
ENSG00000173068	BNC2	-1.19411	2.00244e-05	7.69761e-05
ENSG00000134138	MEIS2	-1.19283	5.66487e-09	4.47922e-08
ENSG00000223547	ZNF844	-1.19219	1.98642e-07	1.15425e-06
ENSG00000124615	MOCS1	-1.19109	4.69786e-11	5.66254e-10
ENSG00000118298	CA14	-1.18929	8.69174e-09	6.60089e-08
ENSG00000176046	NUPR1	-1.18905	1.14847e-06	5.77426e-06
ENSG00000169851	PCDH7	-1.18856	0.000175456	0.000546273
ENSG00000188613	NANOS1	-1.18847	1.61034e-06	7.8308e-06
ENSG00000141404	GNAL	-1.18668	3.20658e-08	2.16421e-07
ENSG00000092621	PHGDH	-1.18199	3.27115e-05	0.00012028
ENSG00000114923	SLC4A3	-1.18165	0.000643608	0.00174846
ENSG00000135821	GLUL	-1.18105	3.43037e-14	7.78133e-13
ENSG00000146374	RSPO3	-1.17887	0.00106317	0.00273679
ENSG00000165092	ALDH1A1	-1.17871	0.00293436	0.00679084
ENSG00000163520	FBLN2	-1.17715	5.06893e-05	0.000179227
ENSG00000175344	CHRNA7	-1.17697	0.000414931	0.00117953
ENSG00000177606	JUN	-1.17566	2.10731e-11	2.73038e-10
ENSG00000166681	BEX3	-1.17527	1.65191e-06	8.01041e-06
ENSG00000105784	RUNDC3B	-1.17366	2.68896e-07	1.5188e-06
ENSG00000139737	SLAIN1	-1.1734	9.99705e-06	4.10459e-05
ENSG00000158301	GPRASP2	-1.17336	1.70097e-11	2.25843e-10
ENSG00000083720	OXCT1	-1.17288	1.20904e-07	7.28657e-07
ENSG00000169184	MN1	-1.17269	5.54e-05	0.000194381
ENSG00000133874	RNF122	-1.17178	5.41254e-14	1.18459e-12
ENSG00000130224	LRCH2	-1.17123	4.37904e-07	2.37927e-06
ENSG00000131171	SH3BGRL	-1.17016	9.74709e-11	1.09783e-09
ENSG00000115468	EFHD1	-1.16841	3.8453e-08	2.55385e-07
ENSG00000068383	INPP5A	-1.16775	8.3708e-22	8.74215e-20
ENSG00000143515	ATP8B2	-1.16727	1.36522e-08	9.94109e-08
ENSG00000121297	TSHZ3	-1.16623	3.66899e-08	2.44301e-07
ENSG00000117318	ID3	-1.16595	2.87562e-13	5.3733e-12
ENSG00000185614	FAM212A	-1.16542	8.17971e-11	9.4215e-10
ENSG00000235109	ZSCAN31	-1.16497	3.93208e-14	8.79124e-13
ENSG00000178726	THBD	-1.16483	5.98417e-10	5.75523e-09
ENSG00000162733	DDR2	-1.16367	8.24681e-06	3.44322e-05
ENSG00000115461	IGFBP5	-1.16267	6.17967e-06	2.63674e-05
ENSG00000164039	BDH2	-1.16261	5.9537e-16	1.92235e-14
ENSG00000100612	DHRS7	-1.16244	8.1514e-17	3.11656e-15
ENSG00000099785	2020-03-02	-1.16211	4.09554e-21	3.88602e-19
ENSG00000117152	RGS4	-1.1613	9.66009e-05	0.000320996
ENSG00000142178	SIK1	-1.16049	0.000590667	0.00161536
ENSG00000088280	ASAP3	-1.16006	5.85729e-10	5.65067e-09
ENSG00000161835	GRASP	-1.15857	1.59905e-12	2.61099e-11
ENSG00000089486	CDIP1	-1.15836	9.01249e-11	1.02592e-09
ENSG00000138796	HADH	-1.15815	4.46181e-19	2.92955e-17
ENSG00000187955	COL14A1	-1.15788	0.00013325	0.000428056
ENSG00000198513	ATL1	-1.15655	3.59734e-15	9.80353e-14
ENSG00000005102	MEOX1	-1.15607	2.34699e-05	8.90767e-05
ENSG00000154277	UCHL1	-1.15574	0.000534018	0.00147783
ENSG00000165475	CRYL1	-1.15562	2.17887e-11	2.81607e-10
ENSG00000144935	TRPC1	-1.1555	5.12319e-07	2.7443e-06
ENSG00000196437	ZNF569	-1.15548	3.29298e-08	2.21635e-07
ENSG00000107738	VSIR	-1.15514	9.83151e-13	1.66654e-11
ENSG00000128045	RASL11B	-1.15509	5.19554e-05	0.000183179
ENSG00000160678	S100A1	-1.15459	5.83994e-06	2.50829e-05
ENSG00000175416	CLTB	-1.151	2.32268e-12	3.63248e-11
ENSG00000163346	PBXIP1	-1.15008	3.50606e-14	7.94146e-13
ENSG00000084764	MAPRE3	-1.14953	1.69209e-10	1.81715e-09
ENSG00000235863	B3GALT4	-1.14844	2.2319e-15	6.34929e-14
ENSG00000164946	FREM1	-1.14832	0.0044213	0.00975885
ENSG00000107186	MPDZ	-1.14564	1.23486e-06	6.16676e-06
ENSG00000082497	SERTAD4	-1.14542	0.000126232	0.000407616
ENSG00000125648	SLC25A23	-1.14523	3.5948e-13	6.61215e-12
ENSG00000182749	PAQR7	-1.14469	3.43189e-13	6.33495e-12
ENSG00000134775	FHOD3	-1.14445	2.81723e-05	0.000105148
ENSG00000090013	BLVRB	-1.14373	3.08673e-11	3.85185e-10
ENSG00000154654	NCAM2	-1.14293	0.00218527	0.00522122
ENSG00000114115	RBP1	-1.14232	1.35288e-05	5.41188e-05
ENSG00000196139	AKR1C3	-1.14169	0.000716681	0.00192613
ENSG00000175183	CSRP2	-1.14147	1.59552e-09	1.41793e-08
ENSG00000132329	RAMP1	-1.14132	0.000429145	0.00121197
ENSG00000129116	PALLD	-1.13996	9.90845e-07	5.04038e-06
ENSG00000173258	ZNF483	-1.13719	3.44619e-06	1.55845e-05
ENSG00000103044	HAS3	-1.13701	0.000269245	0.000801094
ENSG00000085265	FCN1	-1.13585	9.0743e-05	0.000303667
ENSG00000137103	TMEM8B	-1.1345	1.3706e-14	3.32729e-13
ENSG00000269190	FBXO17	-1.13318	8.37962e-05	0.000282119
ENSG00000072840	EVC	-1.13313	2.2841e-06	1.07381e-05
ENSG00000154723	ATP5J	-1.13242	1.36286e-19	1.00035e-17
ENSG00000069667	RORA	-1.13123	4.70841e-10	4.64896e-09
ENSG00000179314	WSCD1	-1.13039	2.53847e-05	9.57138e-05
ENSG00000183172	SMDT1	-1.13005	6.56551e-24	1.05326e-21
ENSG00000078053	AMPH	-1.12981	6.4743e-07	3.40475e-06
ENSG00000121671	CRY2	-1.12979	1.51073e-22	1.78094e-20
ENSG00000133069	TMCC2	-1.1297	4.73842e-09	3.81451e-08
ENSG00000077264	PAK3	-1.12851	0.000425752	0.00120435
ENSG00000154102	C16orf74	-1.1284	5.91616e-06	2.53752e-05
ENSG00000140876	NUDT7	-1.12621	5.29297e-10	5.15096e-09
ENSG00000149577	SIDT2	-1.12604	1.88598e-17	8.3612e-16
ENSG00000272602	ZNF595	-1.12557	1.18148e-05	4.7865e-05
ENSG00000111879	FAM184A	-1.12492	9.96088e-05	0.000330352
ENSG00000140450	ARRDC4	-1.1243	2.68968e-10	2.79214e-09
ENSG00000182568	SATB1	-1.12322	5.99231e-09	4.71894e-08
ENSG00000177076	ACER2	-1.12248	3.04328e-05	0.0001127
ENSG00000105767	CADM4	-1.12174	9.36545e-09	7.06769e-08
ENSG00000247746	USP51	-1.12148	1.08515e-06	5.47361e-06
ENSG00000110693	SOX6	-1.11902	1.99432e-06	9.50205e-06
ENSG00000128274	A4GALT	-1.119	1.256e-08	9.20616e-08
ENSG00000182263	FIGN	-1.11782	9.45056e-05	0.000314753
ENSG00000106004	HOXA5	-1.11726	5.44063e-07	2.90036e-06
ENSG00000069431	ABCC9	-1.11711	0.000108486	0.000356374
ENSG00000131711	MAP1B	-1.11639	2.03204e-05	7.80179e-05
ENSG00000100154	TTC28	-1.1163	1.57656e-08	1.13368e-07
ENSG00000091986	CCDC80	-1.11608	0.00152042	0.00376739
ENSG00000172458	IL17D	-1.11586	1.14718e-08	8.48444e-08
ENSG00000063127	SLC6A16	-1.11455	8.02974e-06	3.36139e-05
ENSG00000204186	ZDBF2	-1.11422	8.59928e-06	3.57694e-05
ENSG00000138738	PRDM5	-1.1139	1.76888e-05	6.91248e-05
ENSG00000127220	ABHD8	-1.11283	9.96161e-12	1.38933e-10
ENSG00000144063	MALL	-1.1124	7.34452e-05	0.000250444
ENSG00000171827	ZNF570	-1.11176	5.54627e-08	3.57521e-07
ENSG00000154309	DISP1	-1.11101	2.86578e-18	1.54306e-16
ENSG00000088881	EBF4	-1.10957	2.02417e-06	9.62657e-06
ENSG00000121310	ECHDC2	-1.10653	9.40685e-11	1.06381e-09
ENSG00000172159	FRMD3	-1.10585	7.87825e-08	4.93532e-07
ENSG00000103202	NME4	-1.10389	1.34805e-08	9.82528e-08
ENSG00000178184	PARD6G	-1.10325	1.19658e-10	1.31963e-09
ENSG00000102882	MAPK3	-1.10323	2.27078e-15	6.43636e-14
ENSG00000123096	SSPN	-1.10294	3.95814e-06	1.76635e-05
ENSG00000152642	GPD1L	-1.10235	1.27165e-15	3.84984e-14
ENSG00000049769	PPP1R3F	-1.10187	4.20137e-11	5.11561e-10
ENSG00000184867	ARMCX2	-1.10114	6.99866e-07	3.65825e-06
ENSG00000116106	EPHA4	-1.10101	2.95023e-05	0.000109619
ENSG00000168785	TSPAN5	-1.10049	2.24073e-09	1.9211e-08
ENSG00000059728	MXD1	-1.10043	2.78265e-08	1.9025e-07
ENSG00000155974	GRIP1	-1.0998	0.000121498	0.000394128
ENSG00000060762	MPC1	-1.09948	1.4189e-16	5.25701e-15
ENSG00000138735	PDE5A	-1.0991	9.30224e-08	5.72595e-07
ENSG00000165633	VSTM4	-1.0974	2.13997e-06	1.01124e-05
ENSG00000213762	ZNF134	-1.09691	4.46126e-07	2.41972e-06
ENSG00000047597	XK	-1.09684	0.000126584	0.000408581
ENSG00000065154	OAT	-1.0957	8.02446e-09	6.14511e-08
ENSG00000114853	ZBTB47	-1.09536	1.90866e-10	2.0329e-09
ENSG00000159208	CIART	-1.0953	1.443e-05	5.7355e-05
ENSG00000167037	SGSM1	-1.09399	8.33146e-05	0.00028074
ENSG00000162873	KLHDC8A	-1.09323	1.28618e-07	7.71264e-07
ENSG00000113580	NR3C1	-1.09303	6.82553e-10	6.48029e-09
ENSG00000135617	PRADC1	-1.09292	3.68696e-18	1.91094e-16
ENSG00000160951	PTGER1	-1.0915	0.000715084	0.0019225
ENSG00000005379	TSPOAP1	-1.09038	2.68338e-06	1.24496e-05
ENSG00000065717	TLE2	-1.08829	1.96408e-07	1.14169e-06
ENSG00000177932	ZNF354C	-1.0871	2.44486e-07	1.39306e-06
ENSG00000099875	MKNK2	-1.08709	4.33215e-18	2.21752e-16
ENSG00000120913	PDLIM2	-1.08634	1.75967e-12	2.84047e-11
ENSG00000123358	NR4A1	-1.08492	5.77669e-05	0.00020164
ENSG00000141504	SAT2	-1.08433	2.82475e-18	1.52625e-16
ENSG00000165269	AQP7	-1.08256	0.000335392	0.000977714
ENSG00000117054	ACADM	-1.08255	8.31658e-17	3.17192e-15
ENSG00000091831	ESR1	-1.0822	2.71055e-06	1.25644e-05
ENSG00000145945	FAM50B	-1.08146	2.4859e-06	1.15887e-05
ENSG00000144619	CNTN4	-1.0803	3.38277e-06	1.53423e-05
ENSG00000114948	ADAM23	-1.07957	4.09315e-05	0.000147884
ENSG00000007237	GAS7	-1.07934	2.93765e-06	1.34966e-05
ENSG00000138640	FAM13A	-1.07793	4.98392e-09	3.99355e-08
ENSG00000111728	ST8SIA1	-1.07784	1.25353e-06	6.24997e-06
ENSG00000173040	EVC2	-1.0774	3.44042e-06	1.55674e-05
ENSG00000130522	JUND	-1.0772	1.33037e-13	2.67467e-12
ENSG00000126785	RHOJ	-1.07681	2.13794e-08	1.49993e-07
ENSG00000151929	BAG3	-1.0761	4.16073e-11	5.07407e-10
ENSG00000125652	ALKBH7	-1.0757	1.6652e-13	3.27174e-12
ENSG00000143434	SEMA6C	-1.07511	6.65801e-09	5.19716e-08
ENSG00000125503	PPP1R12C	-1.07439	4.64129e-13	8.35915e-12
ENSG00000164096	C4orf3	-1.0743	1.98632e-19	1.41138e-17
ENSG00000220205	VAMP2	-1.07377	5.37926e-18	2.71824e-16
ENSG00000197776	KLHDC1	-1.07082	1.76441e-10	1.88831e-09
ENSG00000012822	CALCOCO1	-1.07073	3.24416e-15	8.88775e-14
ENSG00000006016	CRLF1	-1.06875	0.000247824	0.000745051
ENSG00000118898	PPL	-1.06809	0.00045157	0.00127114
ENSG00000138030	KHK	-1.06577	4.83796e-07	2.60767e-06
ENSG00000100302	RASD2	-1.06567	3.17616e-06	1.44812e-05
ENSG00000197019	SERTAD1	-1.06516	7.44488e-15	1.88988e-13
ENSG00000118515	SGK1	-1.0651	3.93832e-08	2.60895e-07
ENSG00000204381	LAYN	-1.06507	1.60764e-06	7.82007e-06
ENSG00000196177	ACADSB	-1.06415	1.2006e-14	2.94676e-13
ENSG00000165731	RET	-1.06385	0.00372288	0.00836659
ENSG00000162999	DUSP19	-1.06215	6.10141e-13	1.0716e-11
ENSG00000174282	ZBTB4	-1.06215	6.70786e-14	1.43974e-12
ENSG00000178163	ZNF518B	-1.06189	5.51711e-06	2.38477e-05
ENSG00000169814	BTD	-1.06188	3.10377e-18	1.65404e-16
ENSG00000182389	CACNB4	-1.06164	4.4766e-05	0.00016036
ENSG00000105649	RAB3A	-1.06059	7.90493e-11	9.16607e-10
ENSG00000163686	ABHD6	-1.06014	9.80023e-18	4.59341e-16
ENSG00000116473	RAP1A	-1.05991	1.01985e-20	8.86583e-19
ENSG00000135437	RDH5	-1.05951	7.63503e-09	5.8758e-08
ENSG00000100784	RPS6KA5	-1.05892	1.05915e-13	2.18298e-12
ENSG00000108839	ALOX12	-1.05874	3.26878e-06	1.48582e-05
ENSG00000167552	TUBA1A	-1.05843	2.03511e-06	9.6727e-06
ENSG00000106211	HSPB1	-1.05781	1.58569e-05	6.25792e-05
ENSG00000165698	SPACA9	-1.05719	1.67159e-10	1.79639e-09
ENSG00000172349	IL16	-1.05713	2.44478e-06	1.14141e-05
ENSG00000180543	TSPYL5	-1.05651	0.00023986	0.000723626
ENSG00000064042	LIMCH1	-1.05568	1.09439e-07	6.6497e-07
ENSG00000213190	MLLT11	-1.05565	2.24583e-07	1.29195e-06
ENSG00000170962	PDGFD	-1.05503	5.76416e-07	3.05608e-06
ENSG00000183049	CAMK1D	-1.05498	9.60353e-07	4.89808e-06
ENSG00000156804	FBXO32	-1.05408	5.19467e-05	0.000183179
ENSG00000129521	EGLN3	-1.05304	5.74998e-08	3.69316e-07
ENSG00000162407	PLPP3	-1.05291	5.21706e-14	1.14342e-12
ENSG00000172345	STARD5	-1.0517	1.22697e-11	1.67629e-10
ENSG00000131018	SYNE1	-1.05153	1.27946e-05	5.14463e-05
ENSG00000166311	SMPD1	-1.05084	5.23906e-17	2.11753e-15
ENSG00000081818	PCDHB4	-1.04975	9.98612e-06	4.10119e-05
ENSG00000135835	KIAA1614	-1.0486	1.01626e-08	7.59921e-08
ENSG00000111432	FZD10	-1.04844	0.00183799	0.00447239
ENSG00000067113	PLPP1	-1.04833	4.89201e-11	5.88744e-10
ENSG00000086619	ERO1B	-1.04694	3.45729e-08	2.31692e-07
ENSG00000139433	GLTP	-1.04676	5.79937e-16	1.88401e-14
ENSG00000008441	NFIX	-1.04673	2.90008e-09	2.42494e-08
ENSG00000163297	ANTXR2	-1.0465	2.4195e-06	1.13063e-05
ENSG00000234284	ZNF879	-1.04632	4.93708e-06	2.15621e-05
ENSG00000165259	HDX	-1.04608	3.73305e-06	1.67648e-05
ENSG00000250479	CHCHD10	-1.04554	4.59969e-08	3.01753e-07
ENSG00000204116	CHIC1	-1.0451	3.50217e-05	0.000128108
ENSG00000077782	FGFR1	-1.04297	1.59407e-05	6.28621e-05
ENSG00000188921	HACD4	-1.04121	5.37967e-08	3.48079e-07
ENSG00000275993	CU639417.2	-1.04079	3.69034e-06	1.65826e-05
ENSG00000156299	TIAM1	-1.04044	4.86704e-06	2.13041e-05
ENSG00000111275	ALDH2	-1.04037	3.85451e-10	3.87468e-09
ENSG00000047648	ARHGAP6	-1.04037	1.49529e-05	5.92821e-05
ENSG00000171227	TMEM37	-1.0402	8.19334e-06	3.42365e-05
ENSG00000157110	RBPMS	-1.03806	1.07852e-06	5.44369e-06
ENSG00000172156	CCL11	-1.03735	0.00121742	0.00309143
ENSG00000177469	CAVIN1	-1.03731	3.89788e-06	1.74296e-05
ENSG00000013583	HEBP1	-1.03713	4.177e-13	7.5958e-12
ENSG00000130821	SLC6A8	-1.03671	0.000244547	0.00073648
ENSG00000104723	TUSC3	-1.03653	3.34099e-06	1.51705e-05
ENSG00000143845	ETNK2	-1.0358	0.000718802	0.00193049
ENSG00000072210	ALDH3A2	-1.03567	6.52076e-14	1.40151e-12
ENSG00000130413	STK33	-1.03547	0.000744606	0.00198677
ENSG00000081853	PCDHGA2	-1.03432	7.11826e-06	3.00427e-05
ENSG00000183741	CBX6	-1.03423	1.77729e-05	6.9349e-05
ENSG00000087884	AAMDC	-1.03418	7.21516e-15	1.83756e-13
ENSG00000181790	ADGRB1	-1.03364	0.000140488	0.000448438
ENSG00000187098	MITF	-1.03364	2.18396e-07	1.26009e-06
ENSG00000110076	NRXN2	-1.03231	0.00246268	0.00580721
ENSG00000176971	FIBIN	-1.03176	2.8751e-05	0.000107083
ENSG00000153956	CACNA2D1	-1.0301	4.81352e-05	0.000171384
ENSG00000013297	CLDN11	-1.03009	0.000783115	0.00207989
ENSG00000171867	PRNP	-1.02914	6.46448e-08	4.11259e-07
ENSG00000095321	CRAT	-1.02888	8.6648e-08	5.37397e-07
ENSG00000221923	ZNF880	-1.02872	3.32471e-05	0.000122163
ENSG00000116667	C1orf21	-1.028	4.1386e-08	2.7358e-07
ENSG00000105227	PRX	-1.02756	2.25307e-10	2.36732e-09
ENSG00000198816	ZNF358	-1.02661	4.01024e-10	4.01774e-09
ENSG00000198157	HMGN5	-1.02646	1.40306e-05	5.59677e-05
ENSG00000138639	ARHGAP24	-1.02624	2.3089e-08	1.60827e-07
ENSG00000169583	CLIC3	-1.02533	0.00053142	0.00147143
ENSG00000144648	ACKR2	-1.02487	1.5157e-06	7.41925e-06
ENSG00000162772	ATF3	-1.02461	1.14043e-05	4.6359e-05
ENSG00000104324	CPQ	-1.02442	1.22305e-09	1.1108e-08
ENSG00000088854	C20orf194	-1.0239	6.9306e-07	3.62755e-06
ENSG00000137857	DUOX1	-1.02257	0.00117339	0.00299232
ENSG00000164114	MAP9	-1.02254	2.16826e-05	8.29203e-05
ENSG00000182022	CHST15	-1.02234	3.35874e-06	1.52422e-05
ENSG00000113231	PDE8B	-1.02223	3.73415e-09	3.06796e-08
ENSG00000087494	PTHLH	-1.02102	0.00011173	0.000365181
ENSG00000005469	CROT	-1.02092	1.049e-08	7.82367e-08
ENSG00000189077	TMEM120A	-1.02037	7.94507e-17	3.04515e-15
ENSG00000142459	EVI5L	-1.01905	2.84703e-17	1.21377e-15
ENSG00000117640	MTFR1L	-1.01898	3.88326e-27	9.90613e-25
ENSG00000140285	FGF7	-1.01839	0.000923709	0.00240929
ENSG00000124191	TOX2	-1.01748	1.10569e-08	8.22057e-08
ENSG00000146966	DENND2A	-1.01721	6.30927e-09	4.95101e-08
ENSG00000005882	PDK2	-1.01699	6.80916e-15	1.737e-13
ENSG00000137449	CPEB2	-1.01486	6.08162e-16	1.95934e-14
ENSG00000103710	RASL12	-1.01452	3.23241e-07	1.7969e-06
ENSG00000253305	PCDHGB6	-1.01424	4.41653e-06	1.95188e-05
ENSG00000048052	HDAC9	-1.01398	8.15771e-05	0.000275482
ENSG00000125868	DSTN	-1.01364	5.83705e-11	6.93361e-10
ENSG00000157379	DHRS1	-1.01361	4.11535e-15	1.10603e-13
ENSG00000165804	ZNF219	-1.01257	1.017e-10	1.14182e-09
ENSG00000007312	CD79B	-1.01072	0.00168568	0.00413345
ENSG00000173705	SUSD5	-1.00961	0.000708783	0.0019088
ENSG00000197872	FAM49A	-1.00951	4.80644e-07	2.59158e-06
ENSG00000126458	RRAS	-1.00927	2.19393e-08	1.53506e-07
ENSG00000133985	TTC9	-1.00799	0.000228741	0.000694662
ENSG00000167693	NXN	-1.00756	6.18788e-06	2.63952e-05
ENSG00000253304	TMEM200B	-1.00705	1.22417e-05	4.93891e-05
ENSG00000163820	FYCO1	-1.00511	2.78306e-10	2.87947e-09
ENSG00000172794	RAB37	-1.00497	1.50829e-05	5.97365e-05
ENSG00000160445	ZER1	-1.004	7.758e-22	8.26864e-20
ENSG00000129048	ACKR4	-1.004	0.00141371	0.00353222
ENSG00000115286	NDUFS7	-1.00268	4.62072e-16	1.51375e-14
ENSG00000163683	SMIM14	-1.00226	1.87281e-14	4.44928e-13
ENSG00000198440	ZNF583	-1.00215	1.40056e-06	6.93198e-06
ENSG00000099822	HCN2	-1.00208	0.000106307	0.000350328
ENSG00000109458	GAB1	-1.00185	2.67689e-12	4.14066e-11
ENSG00000171649	ZIK1	-1.00177	5.64777e-06	2.43112e-05
ENSG00000198835	GJC2	-1.00165	5.70721e-05	0.000199573
ENSG00000075239	ACAT1	-1.00127	5.54229e-15	1.43739e-13
ENSG00000274180	NATD1	-1.00077	5.85127e-12	8.49363e-11
ENSG00000138821	SLC39A8	1.00101	4.74865e-05	0.000169481
ENSG00000116833	NR5A2	1.00124	0.00381621	0.00855309
ENSG00000106683	LIMK1	1.00149	1.47422e-13	2.94484e-12
ENSG00000131389	SLC6A6	1.00165	3.82073e-12	5.74439e-11
ENSG00000120756	PLS1	1.00189	5.19201e-05	0.000183179
ENSG00000213793	ZNF888	1.00197	1.21345e-05	4.90453e-05
ENSG00000170909	OSCAR	1.00245	4.04438e-05	0.000146223
ENSG00000132623	ANKEF1	1.00254	3.51142e-08	2.34556e-07
ENSG00000138134	STAMBPL1	1.00258	3.20531e-07	1.78402e-06
ENSG00000179178	TMEM125	1.00293	0.000395539	0.00113039
ENSG00000025708	TYMP	1.00511	6.1535e-06	2.62918e-05
ENSG00000111816	FRK	1.00615	8.35945e-06	3.48464e-05
ENSG00000064763	FAR2	1.00709	0.000110455	0.00036185
ENSG00000060656	PTPRU	1.00812	0.00401335	0.0089511
ENSG00000113645	WWC1	1.00848	1.04186e-06	5.27061e-06
ENSG00000134222	PSRC1	1.01044	1.60387e-06	7.8042e-06
ENSG00000127311	HELB	1.01119	3.92214e-09	3.2038e-08
ENSG00000072274	TFRC	1.01272	4.97038e-08	3.24975e-07
ENSG00000091490	SEL1L3	1.01359	5.3108e-09	4.23584e-08
ENSG00000120539	MASTL	1.01365	8.82919e-12	1.24561e-10
ENSG00000253729	PRKDC	1.01368	3.88289e-16	1.28831e-14
ENSG00000120055	C10orf95	1.01552	1.48092e-06	7.26499e-06
ENSG00000165732	DDX21	1.0173	5.64499e-19	3.62982e-17
ENSG00000100196	KDELR3	1.01852	3.05135e-06	1.39735e-05
ENSG00000185477	GPRIN3	1.01853	0.000254184	0.000761377
ENSG00000187608	ISG15	1.01926	0.000300375	0.000883412
ENSG00000128165	ADM2	1.02014	0.00143411	0.00357976
ENSG00000120694	HSPH1	1.02042	5.9315e-11	7.03506e-10
ENSG00000167642	SPINT2	1.02328	4.8151e-08	3.1522e-07
ENSG00000170421	KRT8	1.0271	8.81143e-06	3.65444e-05
ENSG00000168672	FAM84B	1.02832	3.44902e-07	1.90658e-06
ENSG00000005801	ZNF195	1.02916	1.2565e-11	1.71212e-10
ENSG00000198720	ANKRD13B	1.03017	1.01625e-05	4.16811e-05
ENSG00000156127	BATF	1.03028	0.000109865	0.000360198
ENSG00000117632	STMN1	1.03146	2.06058e-11	2.68323e-10
ENSG00000107242	PIP5K1B	1.03272	0.00124316	0.00314909
ENSG00000198298	ZNF485	1.03306	1.03935e-12	1.75606e-11
ENSG00000167747	C19orf48	1.03474	4.25267e-08	2.80644e-07
ENSG00000130193	THEM6	1.035	2.65762e-08	1.82664e-07
ENSG00000177202	SPACA4	1.0358	0.00103619	0.00267356
ENSG00000120875	DUSP4	1.03831	0.000292631	0.000863575
ENSG00000130477	UNC13A	1.0385	0.00394603	0.00881484
ENSG00000151503	NCAPD3	1.03919	1.10372e-11	1.51991e-10
ENSG00000105810	CDK6	1.03992	3.50007e-06	1.5796e-05
ENSG00000136824	SMC2	1.04168	1.33289e-11	1.80829e-10
ENSG00000149636	DSN1	1.04179	2.38882e-11	3.05442e-10
ENSG00000181847	TIGIT	1.04197	0.000971377	0.00252095
ENSG00000173207	CKS1B	1.04371	9.57504e-09	7.20489e-08
ENSG00000102554	KLF5	1.04378	2.41193e-06	1.1281e-05
ENSG00000164695	CHMP4C	1.04418	5.05018e-05	0.000178645
ENSG00000130816	DNMT1	1.04534	4.70212e-18	2.39116e-16
ENSG00000122966	CIT	1.04657	7.66932e-10	7.22411e-09
ENSG00000181773	GPR3	1.04661	5.12702e-05	0.000181075
ENSG00000254087	LYN	1.04681	1.35337e-10	1.481e-09
ENSG00000168411	RFWD3	1.05009	3.0634e-16	1.04082e-14
ENSG00000065600	TMEM206	1.05014	7.74924e-16	2.45093e-14
ENSG00000025772	TOMM34	1.05032	1.12634e-11	1.54969e-10
ENSG00000135069	PSAT1	1.05149	0.000960581	0.00249709
ENSG00000059588	TARBP1	1.05185	3.72268e-12	5.60781e-11
ENSG00000124571	XPO5	1.05229	3.62106e-13	6.65257e-12
ENSG00000117877	CD3EAP	1.05232	7.79877e-10	7.3283e-09
ENSG00000243649	CFB	1.05297	0.00150037	0.00372246
ENSG00000075643	MOCOS	1.05346	1.02476e-05	4.2008e-05
ENSG00000163918	RFC4	1.05427	2.59523e-11	3.28595e-10
ENSG00000263528	IKBKE	1.05432	1.97978e-08	1.40033e-07
ENSG00000137101	CD72	1.05437	4.75322e-05	0.000169566
ENSG00000104689	TNFRSF10A	1.05466	5.34298e-08	3.45849e-07
ENSG00000084774	CAD	1.05833	3.30693e-16	1.11625e-14
ENSG00000173083	HPSE	1.05999	9.83659e-06	4.04726e-05
ENSG00000101307	SIRPB1	1.06174	0.00111486	0.00285382
ENSG00000169684	CHRNA5	1.06264	5.4782e-07	2.91739e-06
ENSG00000196187	TMEM63A	1.06291	1.22373e-13	2.47627e-12
ENSG00000163006	CCDC138	1.06351	1.15413e-10	1.27734e-09
ENSG00000141497	ZMYND15	1.06444	3.42855e-06	1.55182e-05
ENSG00000176619	LMNB2	1.06641	2.38009e-13	4.56115e-12
ENSG00000168487	BMP1	1.06771	1.57466e-11	2.10871e-10
ENSG00000113810	SMC4	1.06799	3.39348e-12	5.13676e-11
ENSG00000182472	CAPN12	1.06981	0.00124983	0.00316439
ENSG00000111335	OAS2	1.06991	1.64513e-05	6.47606e-05
ENSG00000159259	CHAF1B	1.07103	8.20535e-09	6.26821e-08
ENSG00000186827	TNFRSF4	1.0718	3.81349e-06	1.70817e-05
ENSG00000169258	GPRIN1	1.07308	0.000107537	0.000353406
ENSG00000211448	DIO2	1.07366	0.000336968	0.000981752
ENSG00000136379	ABHD17C	1.07383	1.40813e-07	8.38026e-07
ENSG00000143226	FCGR2A	1.07425	2.69892e-05	0.000101175
ENSG00000109265	KIAA1211	1.07448	0.000153132	0.000484032
ENSG00000113083	LOX	1.07455	6.21775e-05	0.000215441
ENSG00000115415	STAT1	1.07589	9.96394e-12	1.38933e-10
ENSG00000261236	BOP1	1.07617	5.33145e-11	6.38175e-10
ENSG00000158023	WDR66	1.07698	5.23384e-05	0.000184429
ENSG00000149346	SLX4IP	1.0771	2.86381e-12	4.41225e-11
ENSG00000105281	SLC1A5	1.07756	1.26465e-08	9.26079e-08
ENSG00000119285	HEATR1	1.07832	3.91281e-15	1.05524e-13
ENSG00000140451	PIF1	1.07863	3.19933e-08	2.1622e-07
ENSG00000124171	PARD6B	1.07925	2.93909e-06	1.34992e-05
ENSG00000166508	MCM7	1.08003	2.5377e-11	3.2236e-10
ENSG00000153551	CMTM7	1.08074	3.61756e-06	1.62838e-05
ENSG00000203668	CHML	1.08443	4.42178e-08	2.9131e-07
ENSG00000152939	MARVELD2	1.08533	4.03179e-08	2.6686e-07
ENSG00000078900	TP73	1.0869	0.00144659	0.0036057
ENSG00000169330	KIAA1024	1.08762	3.49027e-07	1.92664e-06
ENSG00000115687	PASK	1.08989	2.2417e-11	2.8829e-10
ENSG00000125618	PAX8	1.09095	0.000492589	0.00137319
ENSG00000166451	CENPN	1.09164	2.39634e-10	2.50938e-09
ENSG00000074181	NOTCH3	1.09231	4.83909e-09	3.88751e-08
ENSG00000139354	GAS2L3	1.09249	1.70359e-07	1.00339e-06
ENSG00000111641	NOP2	1.09261	1.41351e-15	4.22994e-14
ENSG00000185482	STAC3	1.09315	1.19294e-09	1.08557e-08
ENSG00000114993	RTKN	1.0955	2.13528e-10	2.24963e-09
ENSG00000198915	RASGEF1A	1.09645	0.00438632	0.00969401
ENSG00000165661	QSOX2	1.0967	2.2447e-12	3.52471e-11
ENSG00000054967	RELT	1.09771	1.89614e-10	2.02094e-09
ENSG00000129354	AP1M2	1.0978	7.65138e-06	3.21358e-05
ENSG00000205336	ADGRG1	1.10071	4.20943e-09	3.41339e-08
ENSG00000130768	SMPDL3B	1.10242	0.00101453	0.00262332
ENSG00000040608	RTN4R	1.10324	1.71474e-05	6.72116e-05
ENSG00000117593	DARS2	1.1038	1.60478e-11	2.14168e-10
ENSG00000176853	FAM91A1	1.10399	9.40807e-20	7.03841e-18
ENSG00000196371	FUT4	1.10421	4.55622e-07	2.46692e-06
ENSG00000161179	YDJC	1.10497	1.48497e-09	1.3265e-08
ENSG00000163359	COL6A3	1.10543	5.05848e-07	2.71264e-06
ENSG00000176153	GPX2	1.10578	0.000595853	0.00162897
ENSG00000073605	GSDMB	1.10607	0.000418969	0.0011884
ENSG00000167524	SGK494	1.10727	2.00617e-08	1.41643e-07
ENSG00000258839	MC1R	1.10812	8.48917e-09	6.46282e-08
ENSG00000128641	MYO1B	1.10898	3.37864e-12	5.11928e-11
ENSG00000177570	SAMD12	1.10981	3.70995e-07	2.03779e-06
ENSG00000196081	ZNF724	1.1112	0.000144162	0.000458661
ENSG00000168496	FEN1	1.11126	2.92389e-11	3.66925e-10
ENSG00000177685	CRACR2B	1.11322	2.46356e-05	9.32056e-05
ENSG00000215788	TNFRSF25	1.11526	2.42809e-05	9.19753e-05
ENSG00000158286	RNF207	1.11693	5.96257e-06	2.55461e-05
ENSG00000144381	HSPD1	1.11728	3.02337e-17	1.28543e-15
ENSG00000144837	PLA1A	1.11767	0.000758478	0.00202058
ENSG00000145604	SKP2	1.11768	1.9238e-08	1.36384e-07
ENSG00000135740	SLC9A5	1.1189	8.22235e-10	7.68457e-09
ENSG00000114529	C3orf52	1.12112	5.53384e-06	2.39001e-05
ENSG00000146674	IGFBP3	1.12143	9.18103e-08	5.66255e-07
ENSG00000162878	PKDCC	1.12208	0.000376562	0.00108232
ENSG00000127507	ADGRE2	1.1233	1.98383e-05	7.63719e-05
ENSG00000122778	KIAA1549	1.12365	4.80604e-05	0.000171176
ENSG00000122254	HS3ST2	1.12523	0.00267126	0.00624082
ENSG00000183765	CHEK2	1.12538	7.74436e-11	9.01346e-10
ENSG00000160336	ZNF761	1.12565	5.20135e-09	4.15494e-08
ENSG00000129667	RHBDF2	1.12679	1.14659e-10	1.2699e-09
ENSG00000115414	FN1	1.12923	7.70745e-05	0.000261754
ENSG00000183840	GPR39	1.12955	5.53555e-05	0.000194268
ENSG00000131398	KCNC3	1.1296	4.07458e-06	1.81415e-05
ENSG00000129514	FOXA1	1.13005	0.00441999	0.00975734
ENSG00000104312	RIPK2	1.13103	7.86936e-13	1.36213e-11
ENSG00000141696	P3H4	1.13109	3.77547e-06	1.69406e-05
ENSG00000203760	CENPW	1.13122	1.62323e-07	9.58966e-07
ENSG00000113721	PDGFRB	1.13167	1.16031e-08	8.57751e-08
ENSG00000144959	NCEH1	1.13222	1.19914e-08	8.84349e-08
ENSG00000118849	RARRES1	1.13232	0.00399809	0.00892216
ENSG00000006453	BAIAP2L1	1.13303	5.75953e-08	3.69722e-07
ENSG00000140937	CDH11	1.13311	1.35465e-05	5.41754e-05
ENSG00000164465	DCBLD1	1.13322	1.22742e-13	2.4805e-12
ENSG00000175305	CCNE2	1.13382	2.44691e-09	2.08181e-08
ENSG00000173852	DPY19L1	1.13406	1.79754e-12	2.89521e-11
ENSG00000164484	TMEM200A	1.1349	0.000729698	0.00195419
ENSG00000160293	VAV2	1.13632	1.09341e-13	2.24467e-12
ENSG00000109881	CCDC34	1.13724	4.45929e-08	2.93408e-07
ENSG00000171365	CLCN5	1.13811	1.33244e-08	9.72065e-08
ENSG00000273604	EPOP	1.13867	0.000154206	0.000486833
ENSG00000151490	PTPRO	1.13881	0.000862653	0.00226752
ENSG00000080839	RBL1	1.13921	2.01445e-12	3.20193e-11
ENSG00000175707	KDF1	1.13936	1.49596e-05	5.92935e-05
ENSG00000116852	KIF21B	1.13957	1.96237e-06	9.36415e-06
ENSG00000015475	BID	1.14046	9.90577e-15	2.47025e-13
ENSG00000175264	CHST1	1.14521	1.45466e-06	7.14936e-06
ENSG00000107815	TWNK	1.14725	1.96509e-12	3.12987e-11
ENSG00000140853	NLRC5	1.14838	1.37895e-08	1.00224e-07
ENSG00000110042	DTX4	1.14859	5.13825e-10	5.0287e-09
ENSG00000165171	METTL27	1.14901	0.000586568	0.00160471
ENSG00000104356	POP1	1.14943	9.04833e-13	1.54049e-11
ENSG00000173193	PARP14	1.14952	5.56362e-15	1.44052e-13
ENSG00000135525	MAP7	1.14977	8.54162e-09	6.49957e-08
ENSG00000275342	PRAG1	1.15018	1.95963e-09	1.71121e-08
ENSG00000080031	PTPRH	1.15057	0.000565369	0.00155299
ENSG00000125885	MCM8	1.15236	7.66799e-11	8.93794e-10
ENSG00000161921	CXCL16	1.15303	8.62233e-12	1.21975e-10
ENSG00000204839	MROH6	1.15426	0.000471403	0.00132076
ENSG00000135763	URB2	1.15573	2.63097e-14	6.10143e-13
ENSG00000120526	NUDCD1	1.15598	2.243e-13	4.30904e-12
ENSG00000113504	SLC12A7	1.15605	1.119e-12	1.88246e-11
ENSG00000132436	FIGNL1	1.15653	8.61887e-12	1.21975e-10
ENSG00000061337	LZTS1	1.15786	1.7439e-05	6.82515e-05
ENSG00000164934	DCAF13	1.15916	5.68633e-14	1.23755e-12
ENSG00000184992	BRI3BP	1.15976	2.86788e-11	3.61061e-10
ENSG00000128944	KNSTRN	1.15988	8.73896e-11	9.97703e-10
ENSG00000040275	SPDL1	1.16136	2.13432e-13	4.12061e-12
ENSG00000188483	IER5L	1.16195	5.81672e-06	2.4997e-05
ENSG00000135362	PRR5L	1.16239	1.66157e-06	8.05474e-06
ENSG00000105327	BBC3	1.1626	2.73736e-07	1.5439e-06
ENSG00000138658	ZGRF1	1.16488	5.34379e-11	6.3916e-10
ENSG00000197385	ZNF860	1.16497	2.33762e-07	1.33931e-06
ENSG00000115339	GALNT3	1.16531	3.07964e-06	1.40865e-05
ENSG00000027869	SH2D2A	1.16918	1.23341e-08	9.06615e-08
ENSG00000160883	HK3	1.17003	2.48249e-05	9.38304e-05
ENSG00000128567	PODXL	1.1734	2.81352e-14	6.48051e-13
ENSG00000197355	UAP1L1	1.17368	1.76534e-07	1.03506e-06
ENSG00000137309	HMGA1	1.17426	8.82278e-10	8.17697e-09
ENSG00000197748	CFAP43	1.17443	1.68537e-06	8.15738e-06
ENSG00000095539	SEMA4G	1.17462	6.6654e-06	2.82693e-05
ENSG00000132000	PODNL1	1.17768	3.00912e-05	0.00011165
ENSG00000161888	SPC24	1.17837	3.22387e-09	2.67412e-08
ENSG00000124429	POF1B	1.17843	0.000331325	0.0009664
ENSG00000159618	ADGRG5	1.17903	8.33035e-06	3.47437e-05
ENSG00000163013	FBXO41	1.18018	5.72328e-06	2.46294e-05
ENSG00000164251	F2RL1	1.1804	0.000123036	0.00039839
ENSG00000132646	PCNA	1.18057	9.11877e-14	1.89884e-12
ENSG00000079462	PAFAH1B3	1.18106	5.62367e-09	4.4489e-08
ENSG00000178826	TMEM139	1.1839	0.00112368	0.0028745
ENSG00000181634	TNFSF15	1.18432	1.29081e-05	5.18756e-05
ENSG00000099849	RASSF7	1.18569	9.04402e-08	5.5869e-07
ENSG00000121454	LHX4	1.18732	4.04795e-10	4.05081e-09
ENSG00000163508	EOMES	1.19052	0.0010936	0.00280724
ENSG00000135077	HAVCR2	1.19101	8.39258e-06	3.49657e-05
ENSG00000134460	IL2RA	1.19172	3.55217e-05	0.000129754
ENSG00000130826	DKC1	1.19178	1.88133e-19	1.34291e-17
ENSG00000185803	SLC52A2	1.19197	1.20554e-12	2.00849e-11
ENSG00000135048	TMEM2	1.19506	1.01954e-13	2.10692e-12
ENSG00000204531	POU5F1	1.1955	9.09627e-05	0.000304206
ENSG00000108511	HOXB6	1.19585	0.000829878	0.00218803
ENSG00000121380	BCL2L14	1.19634	0.000678779	0.001836
ENSG00000130487	KLHDC7B	1.19882	0.000564106	0.0015498
ENSG00000277161	PIGW	1.19952	1.78068e-16	6.5045e-15
ENSG00000111331	OAS3	1.20318	5.4874e-10	5.3169e-09
ENSG00000183763	TRAIP	1.20455	6.7417e-11	7.92353e-10
ENSG00000162639	HENMT1	1.20515	1.04939e-05	4.29161e-05
ENSG00000006327	TNFRSF12A	1.20604	6.41233e-07	3.37444e-06
ENSG00000046604	DSG2	1.20885	9.32914e-08	5.74024e-07
ENSG00000103569	AQP9	1.20971	0.00327409	0.00746861
ENSG00000219438	FAM19A5	1.21069	0.000172382	0.000537886
ENSG00000141756	FKBP10	1.21086	6.55861e-05	0.000226344
ENSG00000141934	PLPP2	1.21227	2.91389e-06	1.33992e-05
ENSG00000243449	C4orf48	1.2144	0.000106422	0.000350558
ENSG00000101463	SYNDIG1	1.21598	0.000651454	0.00176823
ENSG00000121716	PILRB	1.21633	8.07584e-07	4.16533e-06
ENSG00000105486	LIG1	1.21754	1.29092e-12	2.13703e-11
ENSG00000039139	DNAH5	1.21915	0.000381519	0.00109495
ENSG00000106537	TSPAN13	1.2196	2.97729e-09	2.48416e-08
ENSG00000221944	TIGD1	1.22104	5.19302e-12	7.60909e-11
ENSG00000221947	XKR9	1.22171	0.0016528	0.0040605
ENSG00000140968	IRF8	1.2226	4.06062e-06	1.80845e-05
ENSG00000106541	AGR2	1.22366	0.00324771	0.00741565
ENSG00000120334	CENPL	1.22822	2.76432e-17	1.18828e-15
ENSG00000008517	IL32	1.22862	7.12058e-07	3.71574e-06
ENSG00000117586	TNFSF4	1.22875	6.58173e-06	2.79625e-05
ENSG00000006118	TMEM132A	1.22895	2.78619e-07	1.56689e-06
ENSG00000149418	ST14	1.23025	1.54332e-09	1.37389e-08
ENSG00000254521	SIGLEC12	1.23087	0.00105832	0.00272522
ENSG00000169783	LINGO1	1.23183	2.58984e-05	9.74149e-05
ENSG00000164171	ITGA2	1.23239	5.8166e-08	3.72938e-07
ENSG00000113140	SPARC	1.23258	1.09989e-10	1.22428e-09
ENSG00000140379	BCL2A1	1.23412	6.95928e-05	0.000238956
ENSG00000106397	PLOD3	1.23442	3.80442e-15	1.03137e-13
ENSG00000157680	DGKI	1.23447	1.94753e-05	7.51437e-05
ENSG00000197822	OCLN	1.2375	3.00382e-06	1.3768e-05
ENSG00000149243	KLHL35	1.23877	0.000128245	0.000413316
ENSG00000105717	PBX4	1.24043	3.64174e-09	2.99824e-08
ENSG00000260027	HOXB7	1.24114	0.000248128	0.000745822
ENSG00000160932	LY6E	1.24292	1.45294e-08	1.05257e-07
ENSG00000156787	TBC1D31	1.24401	2.57615e-15	7.19703e-14
ENSG00000183317	EPHA10	1.24527	4.70212e-05	0.000167936
ENSG00000100625	SIX4	1.24693	6.77688e-05	0.000233514
ENSG00000013573	DDX11	1.24755	3.56864e-11	4.3968e-10
ENSG00000178718	RPP25	1.24795	4.97513e-10	4.89059e-09
ENSG00000198108	CHSY3	1.24859	7.83963e-09	6.01541e-08
ENSG00000101224	CDC25B	1.25015	2.90872e-11	3.65315e-10
ENSG00000134013	LOXL2	1.25215	1.62743e-09	1.44463e-08
ENSG00000124731	TREM1	1.25367	0.000728441	0.00195167
ENSG00000073464	CLCN4	1.25407	0.000106496	0.000350728
ENSG00000163814	CDCP1	1.25445	5.14143e-08	3.33914e-07
ENSG00000196793	ZNF239	1.257	5.44142e-10	5.27893e-09
ENSG00000137474	MYO7A	1.25924	2.72645e-07	1.5383e-06
ENSG00000112242	E2F3	1.26016	1.52749e-19	1.11072e-17
ENSG00000101276	SLC52A3	1.26035	3.09636e-06	1.41505e-05
ENSG00000012048	BRCA1	1.26248	3.16939e-11	3.94235e-10
ENSG00000149257	SERPINH1	1.26424	3.51523e-18	1.83559e-16
ENSG00000167771	RCOR2	1.26496	0.000173986	0.000542239
ENSG00000141682	PMAIP1	1.26651	4.13597e-06	1.8378e-05
ENSG00000011422	PLAUR	1.26667	6.42747e-08	4.09238e-07
ENSG00000058804	NDC1	1.26741	5.26229e-16	1.7167e-14
ENSG00000106077	ABHD11	1.26793	8.24701e-10	7.70298e-09
ENSG00000163600	ICOS	1.26821	8.44938e-05	0.000284221
ENSG00000128059	PPAT	1.27173	5.82295e-13	1.0285e-11
ENSG00000165923	AGBL2	1.27322	9.26337e-08	5.70428e-07
ENSG00000182324	KCNJ14	1.2739	1.96497e-09	1.71491e-08
ENSG00000121904	CSMD2	1.27396	1.74446e-05	6.82565e-05
ENSG00000120889	TNFRSF10B	1.27453	2.56736e-15	7.18536e-14
ENSG00000171631	P2RY6	1.27625	6.97045e-07	3.64473e-06
ENSG00000137809	ITGA11	1.27839	0.000103927	0.00034372
ENSG00000186638	KIF24	1.27912	1.32597e-10	1.45204e-09
ENSG00000168062	BATF2	1.2796	0.000109695	0.000359814
ENSG00000112877	CEP72	1.28261	1.19333e-08	8.81604e-08
ENSG00000110492	MDK	1.28291	2.31006e-08	1.60836e-07
ENSG00000164087	POC1A	1.28333	2.24624e-09	1.92477e-08
ENSG00000105699	LSR	1.28411	2.18597e-11	2.82055e-10
ENSG00000110944	IL23A	1.28522	1.36388e-06	6.76234e-06
ENSG00000162892	IL24	1.28979	0.000602052	0.00164475
ENSG00000115718	PROC	1.29249	0.00222734	0.005311
ENSG00000130635	COL5A1	1.29307	1.02543e-08	7.66411e-08
ENSG00000157613	CREB3L1	1.29747	1.93498e-05	7.46966e-05
ENSG00000267795	SMIM22	1.29801	0.000454963	0.00127977
ENSG00000127328	RAB3IP	1.29918	1.3223e-11	1.79706e-10
ENSG00000073350	LLGL2	1.30005	7.83721e-12	1.11885e-10
ENSG00000102265	TIMP1	1.30009	6.33222e-12	9.14908e-11
ENSG00000139146	FAM60A	1.30025	2.09053e-15	5.97992e-14
ENSG00000139998	RAB15	1.3051	2.46549e-07	1.40378e-06
ENSG00000146263	MMS22L	1.30667	1.21919e-13	2.47028e-12
ENSG00000151012	SLC7A11	1.30708	0.000770156	0.00204827
ENSG00000147676	MAL2	1.31101	1.67983e-07	9.9127e-07
ENSG00000133106	EPSTI1	1.31123	1.46405e-06	7.18679e-06
ENSG00000138074	SLC5A6	1.31228	1.03649e-13	2.1391e-12
ENSG00000119042	SATB2	1.31576	9.53975e-06	3.9304e-05
ENSG00000239672	NME1	1.31652	7.37782e-11	8.62556e-10
ENSG00000143375	CGN	1.3189	6.96266e-07	3.64311e-06
ENSG00000105963	ADAP1	1.319	1.52477e-08	1.10102e-07
ENSG00000065911	MTHFD2	1.32072	1.55356e-16	5.70165e-15
ENSG00000163435	ELF3	1.32387	1.2105e-07	7.28971e-07
ENSG00000140511	HAPLN3	1.32547	1.34234e-06	6.66715e-06
ENSG00000184307	ZDHHC23	1.32857	1.08655e-11	1.49893e-10
ENSG00000159166	LAD1	1.33267	2.89519e-07	1.62525e-06
ENSG00000108846	ABCC3	1.33555	8.29847e-07	4.27025e-06
ENSG00000131153	GINS2	1.3369	2.39025e-07	1.36544e-06
ENSG00000160401	CFAP157	1.33741	3.65204e-16	1.2143e-14
ENSG00000138795	LEF1	1.33831	1.7612e-07	1.03302e-06
ENSG00000018280	SLC11A1	1.33877	2.76364e-06	1.27801e-05
ENSG00000216490	IFI30	1.33904	1.58703e-11	2.12345e-10
ENSG00000152056	AP1S3	1.33979	7.23208e-09	5.5878e-08
ENSG00000075275	CELSR1	1.34001	5.27789e-06	2.29219e-05
ENSG00000172061	LRRC15	1.34012	0.00391314	0.00875017
ENSG00000112655	PTK7	1.34018	1.07363e-06	5.42251e-06
ENSG00000125895	TMEM74B	1.34177	0.000102245	0.000338518
ENSG00000011201	ANOS1	1.34177	8.50207e-05	0.00028587
ENSG00000103460	TOX3	1.34402	0.000964166	0.00250557
ENSG00000179051	RCC2	1.34554	4.00014e-28	1.17446e-25
ENSG00000196296	ATP2A1	1.34628	2.07732e-08	1.46069e-07
ENSG00000133135	RNF128	1.34642	0.000168298	0.000527151
ENSG00000276070	CCL4L2	1.3482	0.000712394	0.00191626
ENSG00000112559	MDFI	1.34844	1.66808e-05	6.55811e-05
ENSG00000186074	CD300LF	1.35127	6.27917e-07	3.31109e-06
ENSG00000175643	RMI2	1.35519	8.55081e-10	7.94858e-09
ENSG00000138182	KIF20B	1.35714	1.26939e-14	3.09109e-13
ENSG00000159173	TNNI1	1.35825	3.62156e-07	1.99558e-06
ENSG00000026036	RTEL1-TNFRSF6B	1.35841	4.10169e-09	3.33124e-08
ENSG00000180198	RCC1	1.3588	9.00672e-13	1.53619e-11
ENSG00000158714	SLAMF8	1.36315	7.58143e-06	3.1885e-05
ENSG00000196684	HSH2D	1.36332	7.68365e-09	5.90915e-08
ENSG00000127586	CHTF18	1.36375	1.63324e-10	1.75759e-09
ENSG00000168143	FAM83B	1.36462	0.000295192	0.000870473
ENSG00000091127	PUS7	1.36656	9.28119e-13	1.57669e-11
ENSG00000164430	MB21D1	1.36804	2.577e-11	3.26819e-10
ENSG00000131188	PRR7	1.36929	1.13471e-07	6.87852e-07
ENSG00000136122	BORA	1.37001	5.37377e-13	9.54592e-12
ENSG00000100479	POLE2	1.37147	5.93685e-14	1.28847e-12
ENSG00000112379	ARFGEF3	1.3749	1.92343e-09	1.68149e-08
ENSG00000101825	MXRA5	1.37507	8.3446e-09	6.36209e-08
ENSG00000007968	E2F2	1.37806	1.43782e-06	7.09139e-06
ENSG00000162004	CCDC78	1.38086	7.18314e-07	3.74337e-06
ENSG00000000460	C1orf112	1.38098	1.45978e-17	6.62263e-16
ENSG00000157388	CACNA1D	1.38135	5.31927e-05	0.00018727
ENSG00000147799	ARHGAP39	1.38166	7.76692e-10	7.30375e-09
ENSG00000146918	NCAPG2	1.384	2.39452e-12	3.73358e-11
ENSG00000159374	M1AP	1.38419	0.000776838	0.00206498
ENSG00000151790	TDO2	1.38509	1.34369e-05	5.38341e-05
ENSG00000197905	TEAD4	1.38683	1.40201e-13	2.80531e-12
ENSG00000113739	STC2	1.38729	2.95844e-06	1.358e-05
ENSG00000083307	GRHL2	1.39105	3.49588e-06	1.57862e-05
ENSG00000141527	CARD14	1.3924	0.000237235	0.000716958
ENSG00000225556	C2CD4D	1.39603	3.25912e-08	2.19546e-07
ENSG00000163362	INAVA	1.39891	4.45324e-07	2.41705e-06
ENSG00000160949	TONSL	1.40211	1.05267e-10	1.17592e-09
ENSG00000159399	HK2	1.40268	9.03414e-07	4.62131e-06
ENSG00000204516	MICB	1.40276	8.68365e-08	5.38137e-07
ENSG00000126709	IFI6	1.40398	1.09552e-06	5.52052e-06
ENSG00000198554	WDHD1	1.40466	7.15154e-14	1.52237e-12
ENSG00000182481	KPNA2	1.40626	1.42073e-18	8.40609e-17
ENSG00000176678	FOXL1	1.40748	3.00026e-07	1.67879e-06
ENSG00000111665	CDCA3	1.40851	1.55179e-08	1.11897e-07
ENSG00000273045	C2orf15	1.40857	8.30897e-13	1.42711e-11
ENSG00000142273	CBLC	1.40978	8.38822e-07	4.31074e-06
ENSG00000149554	CHEK1	1.41095	1.57205e-13	3.10439e-12
ENSG00000171747	LGALS4	1.4113	0.000885613	0.00231965
ENSG00000054219	LY75	1.41536	1.04929e-08	7.82367e-08
ENSG00000188157	AGRN	1.41577	3.67891e-18	1.91094e-16
ENSG00000118557	PMFBP1	1.41659	8.65713e-07	4.43721e-06
ENSG00000165244	ZNF367	1.4186	4.26617e-13	7.74631e-12
ENSG00000163599	CTLA4	1.42202	2.83106e-06	1.30763e-05
ENSG00000196878	LAMB3	1.42211	2.50624e-08	1.73177e-07
ENSG00000138092	CENPO	1.42261	6.19689e-18	3.06127e-16
ENSG00000169247	SH3TC2	1.42438	6.95937e-05	0.000238956
ENSG00000188368	PRR19	1.42628	2.95218e-08	2.01045e-07
ENSG00000140284	SLC27A2	1.42871	4.15152e-05	0.000149888
ENSG00000111799	COL12A1	1.42907	1.56539e-09	1.39194e-08
ENSG00000135476	ESPL1	1.42988	8.66319e-07	4.43885e-06
ENSG00000174567	GOLT1A	1.43365	0.00203648	0.00490257
ENSG00000198286	CARD11	1.43439	0.000421508	0.00119365
ENSG00000144810	COL8A1	1.43495	0.000499986	0.00139255
ENSG00000104783	KCNN4	1.43515	0.000384552	0.00110243
ENSG00000174669	SLC29A2	1.4373	2.06855e-10	2.18673e-09
ENSG00000134709	HOOK1	1.44017	6.09109e-08	3.88935e-07
ENSG00000181104	F2R	1.44104	2.81068e-13	5.26952e-12
ENSG00000104738	MCM4	1.44357	4.02335e-16	1.32924e-14
ENSG00000129195	PIMREG	1.44529	5.71484e-09	4.50957e-08
ENSG00000114854	TNNC1	1.447	0.000676114	0.00182942
ENSG00000158486	DNAH3	1.44945	1.31537e-06	6.53945e-06
ENSG00000131187	F12	1.45338	0.000153599	0.000485312
ENSG00000174442	ZWILCH	1.45467	2.02246e-19	1.43052e-17
ENSG00000148200	NR6A1	1.45495	7.82151e-10	7.34081e-09
ENSG00000158555	GDPD5	1.45645	7.61745e-07	3.94854e-06
ENSG00000129474	AJUBA	1.46243	1.78258e-08	1.26776e-07
ENSG00000124920	MYRF	1.46737	9.92853e-09	7.44209e-08
ENSG00000174607	UGT8	1.47034	0.000247459	0.000744241
ENSG00000135744	AGT	1.47229	0.00122062	0.00309839
ENSG00000178295	GEN1	1.47356	1.14627e-15	3.49063e-14
ENSG00000154451	GBP5	1.47569	0.000547168	0.001511
ENSG00000128298	BAIAP2L2	1.47591	3.18672e-06	1.45251e-05
ENSG00000135373	EHF	1.47614	3.77359e-06	1.69371e-05
ENSG00000188211	NCR3LG1	1.47671	2.84835e-06	1.31406e-05
ENSG00000176890	TYMS	1.47795	2.02353e-11	2.6372e-10
ENSG00000091879	ANGPT2	1.47903	2.47172e-09	2.10177e-08
ENSG00000213186	TRIM59	1.47965	6.07578e-18	3.02061e-16
ENSG00000121211	MND1	1.4798	7.93509e-11	9.1737e-10
ENSG00000187498	COL4A1	1.49013	8.54624e-18	4.06691e-16
ENSG00000185101	ANO9	1.49174	5.59301e-08	3.60235e-07
ENSG00000114805	PLCH1	1.49227	3.31112e-07	1.83688e-06
ENSG00000082684	SEMA5B	1.49279	4.87145e-09	3.90745e-08
ENSG00000099985	OSM	1.49355	8.26958e-05	0.000278957
ENSG00000184949	FAM227A	1.4939	1.33341e-09	1.20355e-08
ENSG00000142102	PGGHG	1.49415	1.18475e-06	5.94708e-06
ENSG00000180113	TDRD6	1.49517	1.90563e-08	1.35219e-07
ENSG00000197275	RAD54B	1.49802	9.87458e-15	2.46643e-13
ENSG00000186818	LILRB4	1.49904	9.64991e-06	3.9736e-05
ENSG00000038427	VCAN	1.49943	1.21966e-09	1.10859e-08
ENSG00000172244	C5orf34	1.49995	1.18957e-14	2.9243e-13
ENSG00000154096	THY1	1.50214	5.21968e-10	5.09557e-09
ENSG00000165434	PGM2L1	1.50467	3.56857e-14	8.07129e-13
ENSG00000184445	KNTC1	1.51134	1.28563e-16	4.79753e-15
ENSG00000002726	AOC1	1.51378	0.000355906	0.00103152
ENSG00000136108	CKAP2	1.51444	8.46893e-14	1.77369e-12
ENSG00000125319	C17orf53	1.5158	2.16347e-13	4.17171e-12
ENSG00000070882	OSBPL3	1.51585	6.28069e-20	4.96111e-18
ENSG00000073111	MCM2	1.51663	3.14235e-14	7.15932e-13
ENSG00000176208	ATAD5	1.51828	4.90142e-17	1.99662e-15
ENSG00000152669	CCNO	1.51981	1.32068e-05	5.29805e-05
ENSG00000113924	HGD	1.52071	0.00254162	0.00596803
ENSG00000172927	MYEOV	1.52464	0.000957951	0.00249109
ENSG00000160606	TLCD1	1.52712	5.65354e-08	3.63532e-07
ENSG00000013810	TACC3	1.53188	4.50535e-14	9.95849e-13
ENSG00000087237	CETP	1.53642	9.09049e-11	1.03329e-09
ENSG00000100290	BIK	1.53644	4.8467e-07	2.61148e-06
ENSG00000137203	TFAP2A	1.53907	0.000255237	0.000764091
ENSG00000198088	NUP62CL	1.54032	1.42333e-05	5.66599e-05
ENSG00000104147	OIP5	1.54542	8.06001e-13	1.38895e-11
ENSG00000137648	TMPRSS4	1.5472	5.62732e-06	2.425e-05
ENSG00000164220	F2RL2	1.55013	2.74866e-05	0.000102718
ENSG00000196950	SLC39A10	1.5502	2.34695e-14	5.49186e-13
ENSG00000137563	GGH	1.55197	5.42748e-06	2.34929e-05
ENSG00000103253	HAGHL	1.55327	2.57422e-08	1.77481e-07
ENSG00000136943	CTSV	1.55563	0.000163457	0.000513228
ENSG00000120149	MSX2	1.55648	1.21891e-05	4.92279e-05
ENSG00000181649	PHLDA2	1.55908	1.75801e-06	8.4747e-06
ENSG00000111490	TBC1D30	1.56345	3.77628e-10	3.80834e-09
ENSG00000006634	DBF4	1.56427	8.63249e-16	2.68124e-14
ENSG00000173890	GPR160	1.56968	3.96288e-08	2.6241e-07
ENSG00000164611	PTTG1	1.57662	1.50178e-09	1.33998e-08
ENSG00000171208	NETO2	1.58919	5.81997e-06	2.5004e-05
ENSG00000151651	ADAM8	1.58975	3.58048e-08	2.38919e-07
ENSG00000157470	FAM81A	1.59079	1.75685e-08	1.25004e-07
ENSG00000158106	RHPN1	1.59734	4.06664e-09	3.30621e-08
ENSG00000148734	NPFFR1	1.60012	8.75745e-06	3.63496e-05
ENSG00000100558	PLEK2	1.60049	6.74152e-07	3.53691e-06
ENSG00000133119	RFC3	1.60095	1.56463e-13	3.09367e-12
ENSG00000155011	DKK2	1.6029	4.25097e-05	0.000153123
ENSG00000162073	PAQR4	1.60909	1.86902e-10	1.99614e-09
ENSG00000127423	AUNIP	1.60977	4.54087e-13	8.19727e-12
ENSG00000166278	C2	1.6137	1.13164e-07	6.8651e-07
ENSG00000204385	SLC44A4	1.61443	1.97102e-05	7.60314e-05
ENSG00000172818	OVOL1	1.62462	0.000420127	0.0011906
ENSG00000171551	ECEL1	1.62544	0.00037145	0.00107079
ENSG00000179750	APOBEC3B	1.62564	1.41617e-05	5.63893e-05
ENSG00000183010	PYCR1	1.62593	5.32256e-12	7.78424e-11
ENSG00000111602	TIMELESS	1.628	1.91978e-17	8.4628e-16
ENSG00000178623	GPR35	1.63028	6.58854e-09	5.15456e-08
ENSG00000176532	PRR15	1.63101	7.06292e-07	3.68812e-06
ENSG00000143590	EFNA3	1.63124	1.43831e-05	5.72012e-05
ENSG00000197249	SERPINA1	1.63145	4.25012e-05	0.000153123
ENSG00000124225	PMEPA1	1.63799	3.74008e-10	3.77918e-09
ENSG00000164692	COL1A2	1.63964	1.01573e-12	1.71989e-11
ENSG00000178773	CPNE7	1.63996	1.98427e-05	7.63719e-05
ENSG00000086548	CEACAM6	1.64447	0.00251993	0.00592336
ENSG00000157992	KRTCAP3	1.6451	1.32223e-07	7.90745e-07
ENSG00000175538	KCNE3	1.64548	3.61974e-06	1.62888e-05
ENSG00000097046	CDC7	1.64808	3.82581e-15	1.03357e-13
ENSG00000117122	MFAP2	1.64853	1.06989e-05	4.36971e-05
ENSG00000038945	MSR1	1.65067	2.21006e-06	1.04214e-05
ENSG00000276085	CCL3L3	1.653	3.5904e-05	0.000130997
ENSG00000179528	LBX2	1.65508	2.22214e-11	2.86011e-10
ENSG00000127324	TSPAN8	1.65754	2.63759e-05	9.91149e-05
ENSG00000068650	ATP11A	1.65882	6.09238e-21	5.51184e-19
ENSG00000181544	FANCB	1.66059	1.37942e-15	4.15186e-14
ENSG00000163535	SGO2	1.66134	3.76916e-15	1.02359e-13
ENSG00000162745	OLFML2B	1.66269	1.88639e-06	9.03202e-06
ENSG00000106366	SERPINE1	1.66273	1.07139e-06	5.41471e-06
ENSG00000122861	PLAU	1.66447	1.7288e-09	1.52939e-08
ENSG00000100526	CDKN3	1.66895	1.04218e-10	1.16671e-09
ENSG00000029993	HMGB3	1.67152	5.87838e-13	1.03594e-11
ENSG00000164045	CDC25A	1.67244	1.41415e-10	1.53885e-09
ENSG00000204262	COL5A2	1.67537	1.49337e-14	3.58616e-13
ENSG00000154914	USP43	1.67539	6.18526e-10	5.9303e-09
ENSG00000101255	TRIB3	1.68024	4.77746e-05	0.000170275
ENSG00000163507	KIAA1524	1.68259	1.13957e-17	5.27763e-16
ENSG00000167183	PRR15L	1.68334	2.48865e-08	1.72039e-07
ENSG00000180767	CHST13	1.68356	0.000212732	0.000651382
ENSG00000183914	DNAH2	1.68357	2.90769e-05	0.000108168
ENSG00000142185	TRPM2	1.68842	8.02332e-10	7.51209e-09
ENSG00000105976	MET	1.68882	3.26054e-12	4.95966e-11
ENSG00000104413	ESRP1	1.69012	1.41814e-11	1.91727e-10
ENSG00000170608	FOXA3	1.69126	7.44718e-05	0.000253635
ENSG00000162063	CCNF	1.69391	9.08691e-14	1.89546e-12
ENSG00000136295	TTYH3	1.6949	1.2614e-21	1.27459e-19
ENSG00000182600	C2orf82	1.69709	1.52754e-06	7.47014e-06
ENSG00000140678	ITGAX	1.70652	5.4381e-09	4.31967e-08
ENSG00000159216	RUNX1	1.70694	3.64196e-28	1.08986e-25
ENSG00000016391	CHDH	1.70851	1.88822e-11	2.47954e-10
ENSG00000146955	RAB19	1.71279	2.91815e-09	2.43874e-08
ENSG00000147536	GINS4	1.71536	9.58796e-15	2.40025e-13
ENSG00000204410	MSH5	1.71675	4.77265e-11	5.74824e-10
ENSG00000142731	PLK4	1.71796	2.46239e-14	5.73611e-13
ENSG00000147889	CDKN2A	1.71851	0.00233153	0.00553231
ENSG00000164266	SPINK1	1.7215	0.00186473	0.00453108
ENSG00000143674	MAP3K21	1.72162	1.98678e-11	2.59147e-10
ENSG00000051180	RAD51	1.72337	2.67664e-16	9.3809e-15
ENSG00000126778	SIX1	1.72404	1.52887e-05	6.04438e-05
ENSG00000108375	RNF43	1.7296	5.2503e-06	2.28148e-05
ENSG00000174938	SEZ6L2	1.72978	8.45906e-10	7.87354e-09
ENSG00000104415	WISP1	1.73112	2.70347e-07	1.52644e-06
ENSG00000133466	C1QTNF6	1.73231	7.31099e-13	1.26971e-11
ENSG00000175130	MARCKSL1	1.73621	4.5703e-24	7.64714e-22
ENSG00000086300	SNX10	1.73665	7.99669e-12	1.13744e-10
ENSG00000185480	PARPBP	1.73689	1.64613e-15	4.8514e-14
ENSG00000172167	MTBP	1.737	1.91278e-18	1.08323e-16
ENSG00000113368	LMNB1	1.74076	1.85936e-15	5.39803e-14
ENSG00000174939	ASPHD1	1.7439	3.48695e-05	0.000127581
ENSG00000145244	CORIN	1.74822	1.44706e-07	8.59455e-07
ENSG00000136982	DSCC1	1.74921	6.27973e-15	1.61786e-13
ENSG00000235162	C12orf75	1.74948	2.76185e-11	3.48558e-10
ENSG00000188910	GJB3	1.75333	0.000622421	0.00169555
ENSG00000049768	FOXP3	1.75639	2.11151e-10	2.22912e-09
ENSG00000124766	SOX4	1.75804	2.053e-20	1.75532e-18
ENSG00000100162	CENPM	1.76358	3.97397e-11	4.86921e-10
ENSG00000102384	CENPI	1.76691	6.24636e-18	3.06623e-16
ENSG00000157399	ARSE	1.76699	0.000311733	0.000913364
ENSG00000049249	TNFRSF9	1.76732	2.10321e-09	1.8243e-08
ENSG00000198759	EGFL6	1.76995	7.77562e-07	4.02383e-06
ENSG00000099617	EFNA2	1.77081	0.000892045	0.00233453
ENSG00000151725	CENPU	1.77264	4.13699e-12	6.17808e-11
ENSG00000144554	FANCD2	1.77327	2.13438e-16	7.67047e-15
ENSG00000105173	CCNE1	1.77456	5.38588e-06	2.33323e-05
ENSG00000123843	C4BPB	1.77511	0.00045622	0.00128279
ENSG00000068489	PRR11	1.78172	1.40942e-15	4.22581e-14
ENSG00000171877	FRMD5	1.78334	6.26779e-09	4.92343e-08
ENSG00000088305	DNMT3B	1.78339	4.60526e-09	3.71694e-08
ENSG00000095739	BAMBI	1.79008	0.000132304	0.000425106
ENSG00000182379	NXPH4	1.79061	9.93559e-05	0.000329584
ENSG00000178752	ERFE	1.79372	2.0733e-08	1.45853e-07
ENSG00000120254	MTHFD1L	1.79915	2.13939e-23	3.11131e-21
ENSG00000187951	ARHGAP11B	1.8028	3.4243e-16	1.14839e-14
ENSG00000155629	PIK3AP1	1.80321	2.10999e-12	3.33087e-11
ENSG00000168542	COL3A1	1.80588	1.48524e-14	3.57215e-13
ENSG00000101412	E2F1	1.80728	3.94886e-13	7.2292e-12
ENSG00000101311	FERMT1	1.80743	4.61223e-11	5.5766e-10
ENSG00000170537	TMC7	1.8115	2.18794e-10	2.302e-09
ENSG00000132031	MATN3	1.81366	6.73436e-06	2.85307e-05
ENSG00000131650	KREMEN2	1.81475	1.70084e-08	1.21518e-07
ENSG00000221955	SLC12A8	1.82634	2.96496e-16	1.01402e-14
ENSG00000156802	ATAD2	1.82988	4.0139e-18	2.06822e-16
ENSG00000198901	PRC1	1.83213	2.921e-16	1.00561e-14
ENSG00000106462	EZH2	1.83258	4.47599e-16	1.47253e-14
ENSG00000106384	MOGAT3	1.8344	0.00186995	0.00454306
ENSG00000123975	CKS2	1.83823	5.37383e-13	9.54592e-12
ENSG00000180914	OXTR	1.83926	8.78849e-10	8.15004e-09
ENSG00000139734	DIAPH3	1.84121	3.04313e-13	5.66437e-12
ENSG00000121594	CD80	1.84617	3.14109e-11	3.91029e-10
ENSG00000131941	RHPN2	1.84714	2.46392e-11	3.14529e-10
ENSG00000085999	RAD54L	1.85115	3.60528e-14	8.1425e-13
ENSG00000134057	CCNB1	1.85275	6.11076e-14	1.32069e-12
ENSG00000056736	IL17RB	1.85526	2.38877e-10	2.50314e-09
ENSG00000164109	MAD2L1	1.85711	7.96964e-13	1.37642e-11
ENSG00000173621	LRFN4	1.85819	2.12227e-12	3.34596e-11
ENSG00000162782	TDRD5	1.86056	0.00037068	0.00106877
ENSG00000204128	C2orf72	1.86289	1.34748e-05	5.3972e-05
ENSG00000104951	IL4I1	1.86548	8.12875e-09	6.21579e-08
ENSG00000165905	LARGE2	1.86623	7.73852e-05	0.000262752
ENSG00000163121	NEURL3	1.86633	3.53566e-05	0.000129212
ENSG00000135119	RNFT2	1.86928	7.71586e-13	1.33853e-11
ENSG00000130203	APOE	1.87217	2.03304e-09	1.77233e-08
ENSG00000196155	PLEKHG4	1.87816	2.92104e-07	1.63905e-06
ENSG00000139540	SLC39A5	1.87864	0.00361534	0.00815811
ENSG00000254726	MEX3A	1.87961	3.60221e-08	2.40163e-07
ENSG00000180921	FAM83H	1.87998	2.02838e-16	7.3575e-15
ENSG00000073792	IGF2BP2	1.88066	3.18688e-10	3.26222e-09
ENSG00000134668	SPOCD1	1.88212	6.2611e-11	7.38658e-10
ENSG00000114270	COL7A1	1.88298	4.30308e-06	1.90498e-05
ENSG00000138346	DNA2	1.88351	1.40952e-16	5.23475e-15
ENSG00000258947	TUBB3	1.88352	7.76795e-10	7.30375e-09
ENSG00000198829	SUCNR1	1.88543	2.86026e-06	1.31877e-05
ENSG00000130475	FCHO1	1.88728	6.32569e-11	7.44584e-10
ENSG00000123219	CENPK	1.88767	1.27335e-17	5.84502e-16
ENSG00000111057	KRT18	1.89233	2.1477e-15	6.13218e-14
ENSG00000183682	BMP8A	1.89267	1.60851e-12	2.62369e-11
ENSG00000135638	EMX1	1.89302	0.00135365	0.00340073
ENSG00000115363	EVA1A	1.89426	1.76029e-07	1.03288e-06
ENSG00000133962	CATSPERB	1.90378	1.22267e-06	6.11375e-06
ENSG00000162062	C16orf59	1.9046	6.36084e-15	1.63335e-13
ENSG00000171241	SHCBP1	1.90649	4.32883e-17	1.79629e-15
ENSG00000140534	TICRR	1.91584	1.7352e-11	2.29995e-10
ENSG00000197506	SLC28A3	1.9163	3.58451e-05	0.000130843
ENSG00000187741	FANCA	1.91714	8.56727e-15	2.15372e-13
ENSG00000136492	BRIP1	1.92003	2.22895e-17	9.72579e-16
ENSG00000234602	MCIDAS	1.92184	1.03614e-07	6.33283e-07
ENSG00000167513	CDT1	1.92523	1.02612e-10	1.15039e-09
ENSG00000077152	UBE2T	1.9299	1.06729e-13	2.19394e-12
ENSG00000129173	E2F8	1.93176	2.59147e-11	3.28386e-10
ENSG00000277632	CCL3	1.93326	5.016e-08	3.27408e-07
ENSG00000157456	CCNB2	1.93473	2.39305e-14	5.58294e-13
ENSG00000116771	AGMAT	1.94284	1.00413e-08	7.51212e-08
ENSG00000149380	P4HA3	1.94562	1.80102e-12	2.89521e-11
ENSG00000170703	TTLL6	1.94586	2.04834e-05	7.85854e-05
ENSG00000145386	CCNA2	1.94736	4.48952e-13	8.11398e-12
ENSG00000140832	MARVELD3	1.9501	8.41273e-11	9.62578e-10
ENSG00000140525	FANCI	1.9542	1.88049e-18	1.07582e-16
ENSG00000186854	TRABD2A	1.95592	4.39314e-05	0.000157624
ENSG00000205277	MUC12	1.95712	0.00106912	0.00275075
ENSG00000109674	NEIL3	1.95812	5.09307e-15	1.33648e-13
ENSG00000171320	ESCO2	1.95953	4.58868e-12	6.78105e-11
ENSG00000122952	ZWINT	1.96808	1.42775e-15	4.26434e-14
ENSG00000205089	CCNI2	1.96887	1.47513e-08	1.06666e-07
ENSG00000069812	HES2	1.96896	1.99958e-05	7.69043e-05
ENSG00000091651	ORC6	1.97249	4.65705e-16	1.52245e-14
ENSG00000115009	CCL20	1.98152	0.00155674	0.00384715
ENSG00000111110	PPM1H	1.98353	1.63701e-12	2.6618e-11
ENSG00000013588	GPRC5A	1.98743	6.99643e-13	1.2178e-11
ENSG00000166897	ELFN2	1.99125	0.000121104	0.000393134
ENSG00000005001	PRSS22	1.9913	9.89937e-06	4.06878e-05
ENSG00000196550	FAM72A	1.99743	1.76606e-20	1.51832e-18
ENSG00000134398	ERN2	2.01382	0.000462254	0.0012984
ENSG00000169436	COL22A1	2.01433	1.28817e-06	6.4083e-06
ENSG00000186340	THBS2	2.01574	1.86379e-07	1.08745e-06
ENSG00000152253	SPC25	2.01639	3.39094e-16	1.13966e-14
ENSG00000170439	METTL7B	2.02671	4.41964e-07	2.40049e-06
ENSG00000206075	SERPINB5	2.02686	0.000697549	0.00188114
ENSG00000137573	SULF1	2.02742	3.39474e-10	3.45717e-09
ENSG00000196932	TMEM26	2.02761	5.71696e-21	5.264e-19
ENSG00000150337	FCGR1A	2.03254	3.5093e-11	4.33055e-10
ENSG00000080986	NDC80	2.03356	3.01887e-16	1.02794e-14
ENSG00000144354	CDCA7	2.03674	4.12588e-11	5.04516e-10
ENSG00000186871	ERCC6L	2.03904	1.4584e-16	5.39052e-15
ENSG00000186603	HPDL	2.03931	3.48617e-07	1.92507e-06
ENSG00000086991	NOX4	2.04046	5.11262e-12	7.50543e-11
ENSG00000169562	GJB1	2.04087	6.46183e-05	0.000223252
ENSG00000125508	SRMS	2.04168	5.31882e-07	2.84127e-06
ENSG00000278023	RDM1	2.04237	7.26667e-14	1.54338e-12
ENSG00000085840	ORC1	2.04674	2.16768e-14	5.11855e-13
ENSG00000073067	CYP2W1	2.04951	0.00314287	0.00719844
ENSG00000142945	KIF2C	2.0513	3.27529e-14	7.45129e-13
ENSG00000138778	CENPE	2.05276	3.90072e-14	8.73368e-13
ENSG00000138160	KIF11	2.05524	2.41783e-19	1.67963e-17
ENSG00000164761	TNFRSF11B	2.05806	1.01907e-05	4.17858e-05
ENSG00000197299	BLM	2.05918	1.89707e-17	8.38645e-16
ENSG00000106484	MEST	2.06063	1.06816e-12	1.80279e-11
ENSG00000183742	MACC1	2.06178	2.76981e-10	2.86766e-09
ENSG00000163808	KIF15	2.06234	1.00204e-15	3.08769e-14
ENSG00000179869	ABCA13	2.07353	1.9722e-05	7.60581e-05
ENSG00000087586	AURKA	2.07474	1.23385e-12	2.05347e-11
ENSG00000132749	TESMIN	2.0782	5.38818e-13	9.5496e-12
ENSG00000076382	SPAG5	2.07831	3.16124e-15	8.67586e-14
ENSG00000058085	LAMC2	2.08259	1.19769e-11	1.64061e-10
ENSG00000131015	ULBP2	2.08634	2.40636e-07	1.37364e-06
ENSG00000179546	HTR1D	2.08801	0.000357063	0.00103411
ENSG00000104899	AMH	2.08927	1.13208e-05	4.60556e-05
ENSG00000158402	CDC25C	2.09155	2.70028e-15	7.53031e-14
ENSG00000175874	CREG2	2.09622	4.88822e-06	2.13848e-05
ENSG00000105011	ASF1B	2.10044	1.38357e-14	3.34833e-13
ENSG00000101194	SLC17A9	2.10164	3.47869e-08	2.32725e-07
ENSG00000237649	KIFC1	2.10716	7.11795e-14	1.51729e-12
ENSG00000139618	BRCA2	2.10718	1.20271e-17	5.53711e-16
ENSG00000111247	RAD51AP1	2.10889	2.23129e-17	9.72579e-16
ENSG00000163975	MELTF	2.10923	7.15293e-07	3.72887e-06
ENSG00000169174	PCSK9	2.1126	0.000149308	0.000473289
ENSG00000078081	LAMP3	2.11342	3.82463e-10	3.84962e-09
ENSG00000101003	GINS1	2.11526	1.44049e-15	4.29416e-14
ENSG00000101670	LIPG	2.11719	2.37143e-08	1.64814e-07
ENSG00000137804	NUSAP1	2.11836	2.18268e-18	1.22616e-16
ENSG00000198734	F5	2.12159	0.000373873	0.00107662
ENSG00000169245	CXCL10	2.12194	5.00106e-05	0.000177189
ENSG00000163734	CXCL3	2.12568	3.01742e-05	0.000111901
ENSG00000160957	RECQL4	2.13305	1.70139e-12	2.75211e-11
ENSG00000178401	DNAJC22	2.13483	8.76488e-12	1.23879e-10
ENSG00000182010	RTKN2	2.13598	2.8318e-13	5.30272e-12
ENSG00000175311	ANKS4B	2.13972	5.36534e-05	0.000188763
ENSG00000111012	CYP27B1	2.14052	6.35379e-14	1.36941e-12
ENSG00000128342	LIF	2.14101	9.37888e-11	1.06142e-09
ENSG00000189057	FAM111B	2.14206	1.8375e-13	3.5954e-12
ENSG00000119969	HELLS	2.14229	1.81547e-19	1.3079e-17
ENSG00000196584	XRCC2	2.1423	2.41038e-18	1.32537e-16
ENSG00000171617	ENC1	2.14556	2.52937e-23	3.61096e-21
ENSG00000154839	SKA1	2.15487	2.0465e-15	5.90073e-14
ENSG00000075702	WDR62	2.15493	1.22481e-14	3.00146e-13
ENSG00000173894	CBX2	2.16011	3.03354e-08	2.05775e-07
ENSG00000154920	EME1	2.16407	3.18697e-19	2.16561e-17
ENSG00000131203	IDO1	2.16539	0.000229014	0.000695051
ENSG00000268104	SLC6A14	2.16689	0.0014047	0.00351335
ENSG00000125798	FOXA2	2.16992	0.00011345	0.000370103
ENSG00000146410	MTFR2	2.17252	1.46922e-17	6.64608e-16
ENSG00000128578	STRIP2	2.17277	1.3471e-12	2.21671e-11
ENSG00000134690	CDCA8	2.18388	6.1488e-16	1.97689e-14
ENSG00000160183	TMPRSS3	2.18501	7.84557e-06	3.28893e-05
ENSG00000188610	FAM72B	2.18595	6.66278e-18	3.24851e-16
ENSG00000101104	PABPC1L	2.19451	4.29683e-10	4.28609e-09
ENSG00000166851	PLK1	2.19501	2.96266e-16	1.01402e-14
ENSG00000008300	CELSR3	2.19792	8.11836e-09	6.2109e-08
ENSG00000137812	KNL1	2.19994	2.25703e-15	6.40906e-14
ENSG00000006611	USH1C	2.20011	4.4974e-08	2.9554e-07
ENSG00000203747	FCGR3A	2.20192	5.10514e-08	3.32112e-07
ENSG00000225614	ZNF469	2.20261	4.30097e-10	4.28747e-09
ENSG00000198826	ARHGAP11A	2.20668	9.28373e-19	5.66526e-17
ENSG00000108244	KRT23	2.22076	0.00318286	0.00728466
ENSG00000011426	ANLN	2.22396	3.87249e-19	2.58596e-17
ENSG00000181885	CLDN7	2.22928	3.47877e-16	1.16415e-14
ENSG00000144395	CCDC150	2.23236	3.17297e-17	1.3417e-15
ENSG00000103534	TMC5	2.23259	2.07685e-11	2.69765e-10
ENSG00000088882	CPXM1	2.23762	2.2385e-09	1.92069e-08
ENSG00000169607	CKAP2L	2.24624	1.14803e-17	5.30104e-16
ENSG00000087116	ADAMTS2	2.24633	3.76948e-10	3.80395e-09
ENSG00000182492	BGN	2.2477	2.03419e-21	2.00342e-19
ENSG00000166803	PCLAF	2.25049	1.25018e-14	3.05401e-13
ENSG00000117399	CDC20	2.25244	1.84488e-13	3.60071e-12
ENSG00000177602	HASPIN	2.255	1.83898e-18	1.05595e-16
ENSG00000171388	APLN	2.25841	2.16734e-08	1.51782e-07
ENSG00000088836	SLC4A11	2.26689	2.08417e-07	1.20744e-06
ENSG00000157193	LRP8	2.26775	2.1686e-12	3.41185e-11
ENSG00000165490	DDIAS	2.26804	5.62431e-18	2.80512e-16
ENSG00000089685	BIRC5	2.26807	4.72481e-13	8.48992e-12
ENSG00000241484	ARHGAP8	2.26908	3.14896e-18	1.67239e-16
ENSG00000183734	ASCL2	2.27082	0.000278517	0.000826154
ENSG00000133063	CHIT1	2.27141	4.85919e-05	0.000172753
ENSG00000179772	FOXS1	2.2799	4.58558e-13	8.26839e-12
ENSG00000258227	CLEC5A	2.28302	2.10917e-11	2.73051e-10
ENSG00000121152	NCAPH	2.28939	2.72549e-15	7.57346e-14
ENSG00000093009	CDC45	2.29529	5.85367e-16	1.89769e-14
ENSG00000138316	ADAMTS14	2.29875	7.37125e-14	1.5606e-12
ENSG00000164749	HNF4G	2.30558	1.21818e-08	8.96695e-08
ENSG00000276043	UHRF1	2.31028	1.74144e-15	5.09372e-14
ENSG00000186564	FOXD2	2.31446	8.68387e-14	1.81626e-12
ENSG00000007952	NOX1	2.31789	1.22175e-05	4.93296e-05
ENSG00000071539	TRIP13	2.32459	2.98831e-15	8.24488e-14
ENSG00000146670	CDCA5	2.32884	2.85086e-15	7.89363e-14
ENSG00000134028	ADAMDEC1	2.329	8.54327e-08	5.30494e-07
ENSG00000135480	KRT7	2.33115	0.000992259	0.00257155
ENSG00000142661	MYOM3	2.3375	2.54495e-06	1.18533e-05
ENSG00000178999	AURKB	2.34163	8.40887e-14	1.76348e-12
ENSG00000100985	MMP9	2.34221	2.13955e-07	1.23722e-06
ENSG00000118513	MYB	2.34811	2.11192e-08	1.48368e-07
ENSG00000079112	CDH17	2.35487	0.0022502	0.00536008
ENSG00000189433	GJB4	2.35963	6.53137e-06	2.7769e-05
ENSG00000169248	CXCL11	2.36097	3.08234e-06	1.40947e-05
ENSG00000141738	GRB7	2.36439	1.28099e-07	7.69041e-07
ENSG00000139292	LGR5	2.3689	0.000213762	0.000654279
ENSG00000171848	RRM2	2.37345	4.15912e-18	2.13597e-16
ENSG00000121621	KIF18A	2.37459	5.49776e-18	2.75082e-16
ENSG00000035499	DEPDC1B	2.37698	4.56387e-16	1.49828e-14
ENSG00000024526	DEPDC1	2.37789	2.17729e-14	5.13346e-13
ENSG00000109805	NCAPG	2.38123	1.62049e-15	4.79002e-14
ENSG00000105664	COMP	2.38138	0.000351308	0.00101953
ENSG00000236699	ARHGEF38	2.38258	2.89227e-12	4.44729e-11
ENSG00000143476	DTL	2.39914	1.08198e-18	6.50065e-17
ENSG00000129810	SGO1	2.40004	2.13466e-19	1.49628e-17
ENSG00000050344	NFE2L3	2.40063	1.39443e-22	1.65639e-20
ENSG00000135100	HNF1A	2.40461	2.05813e-09	1.79019e-08
ENSG00000137807	KIF23	2.4225	8.93817e-19	5.51932e-17
ENSG00000162849	KIF26B	2.42447	8.17295e-11	9.42069e-10
ENSG00000114346	ECT2	2.44393	1.52625e-24	2.82738e-22
ENSG00000189143	CLDN4	2.44623	2.98108e-16	1.01729e-14
ENSG00000075218	GTSE1	2.44753	6.3906e-17	2.51757e-15
ENSG00000123473	STIL	2.45222	1.099e-19	8.105e-18
ENSG00000169894	MUC3A	2.45429	3.21563e-06	1.46384e-05
ENSG00000119888	EPCAM	2.46339	5.10813e-22	5.59772e-20
ENSG00000181085	MAPK15	2.46702	1.37456e-10	1.50102e-09
ENSG00000275718	CCL15	2.46945	1.33521e-06	6.63383e-06
ENSG00000090889	KIF4A	2.47074	1.38362e-16	5.15085e-15
ENSG00000160867	FGFR4	2.48063	4.79151e-10	4.72202e-09
ENSG00000165480	SKA3	2.48072	3.09674e-16	1.04986e-14
ENSG00000111206	FOXM1	2.48907	1.05418e-18	6.38291e-17
ENSG00000170312	CDK1	2.4915	2.22373e-18	1.24473e-16
ENSG00000138755	CXCL9	2.4992	8.00782e-06	3.35333e-05
ENSG00000112742	TTK	2.50078	4.58605e-15	1.21989e-13
ENSG00000143228	NUF2	2.50263	1.00452e-17	4.68003e-16
ENSG00000204613	TRIM10	2.50507	2.10637e-12	3.33087e-11
ENSG00000126583	PRKCG	2.50918	1.47375e-06	7.23211e-06
ENSG00000168078	PBK	2.50936	6.37046e-13	1.11618e-11
ENSG00000153294	ADGRF4	2.51364	5.04886e-06	2.20194e-05
ENSG00000107807	TLX1	2.51373	1.70587e-05	6.68979e-05
[truncated: 129 more rows]

## Sheet: DEmiRNAs
Table S1
GeneSymbol	logFC	PValue	FDR
hsa-miR-133b	-3.84509	8.33107e-31	1.24411e-28
hsa-miR-1-3p	-3.80185	2.09752e-23	6.26459e-22
hsa-miR-133a-3p	-3.7909	2.43408e-25	9.91335e-24
hsa-miR-490-3p	-3.66662	3.03979e-17	3.49186e-16
hsa-miR-204-5p	-3.06773	3.48397e-27	1.95102e-25
hsa-miR-145-5p	-2.54422	6.95425e-25	2.22536e-23
hsa-miR-129-5p	-2.53234	1.65648e-17	2.00569e-16
hsa-miR-139-3p	-2.48455	4.37951e-29	4.83511e-27
hsa-miR-145-3p	-2.41929	7.59608e-27	3.59907e-25
hsa-miR-5683	-2.28744	7.47062e-15	6.31479e-14
hsa-miR-139-5p	-2.2796	4.61545e-33	1.03386e-30
hsa-miR-30a-3p	-2.01277	1.70599e-19	2.38838e-18
hsa-miR-486-5p	-2.00086	7.29338e-19	9.61009e-18
hsa-miR-143-3p	-1.95835	1.59587e-15	1.45908e-14
hsa-miR-29c-3p	-1.93365	3.0425e-25	1.13587e-23
hsa-miR-451a	-1.74402	8.85412e-13	5.50923e-12
hsa-miR-195-3p	-1.71561	1.07596e-19	1.66217e-18
hsa-miR-195-5p	-1.7113	2.01184e-21	4.50652e-20
hsa-miR-187-3p	-1.67522	1.18159e-05	2.87692e-05
hsa-miR-30c-2-3p	-1.67025	1.8672e-14	1.44225e-13
hsa-miR-149-5p	-1.62663	2.39385e-14	1.78741e-13
hsa-miR-144-3p	-1.59531	5.42558e-10	2.33717e-09
hsa-miR-144-5p	-1.55002	4.12871e-11	2.10189e-10
hsa-miR-9-5p	-1.54674	1.48833e-07	4.93905e-07
hsa-miR-218-5p	-1.51998	7.82933e-13	4.9402e-12
hsa-miR-363-3p	-1.48324	4.54702e-11	2.28883e-10
hsa-miR-100-5p	-1.45897	6.67255e-09	2.53331e-08
hsa-miR-365a-3p	-1.44717	3.27015e-28	2.0929e-26
hsa-miR-365b-3p	-1.447	3.19337e-28	2.0929e-26
hsa-miR-30a-5p	-1.44596	4.98544e-13	3.23692e-12
hsa-miR-99a-5p	-1.44411	5.14706e-07	1.59026e-06
hsa-miR-143-5p	-1.44316	1.02215e-11	5.72406e-11
hsa-miR-99a-3p	-1.41133	1.45073e-09	5.96261e-09
hsa-miR-378a-5p	-1.40581	3.70897e-20	6.15414e-19
hsa-let-7c-5p	-1.3224	1.51263e-06	4.34398e-06
hsa-miR-125b-5p	-1.30944	3.05896e-08	1.08763e-07
hsa-miR-29c-5p	-1.29496	2.83691e-21	6.05207e-20
hsa-let-7e-3p	-1.28194	1.8603e-14	1.44225e-13
hsa-miR-497-5p	-1.26929	9.56901e-16	8.93107e-15
hsa-miR-378a-3p	-1.25647	1.48383e-13	9.92172e-13
hsa-miR-326	-1.2335	1.16285e-12	7.13637e-12
hsa-miR-378c	-1.22133	1.22814e-14	1.00037e-13
hsa-miR-29b-2-5p	-1.21557	5.15859e-19	7.00317e-18
hsa-miR-27b-3p	-1.18484	4.99155e-21	1.01646e-19
hsa-miR-125b-2-3p	-1.17185	1.71959e-05	4.05462e-05
hsa-miR-628-3p	-1.11353	9.15422e-08	3.08353e-07
hsa-miR-125a-5p	-1.1017	1.6672e-14	1.33376e-13
hsa-miR-23b-3p	-1.08857	8.3601e-15	6.93579e-14
hsa-miR-26a-5p	-1.0865	1.65231e-20	2.96093e-19
hsa-miR-30e-3p	-1.08375	2.92362e-22	8.18615e-21
hsa-miR-28-3p	-1.03894	1.32277e-16	1.44537e-15
hsa-miR-1247-3p	-1.03439	0.0021195	0.00356968
hsa-miR-101-5p	-1.02666	1.97234e-12	1.19406e-11
hsa-miR-328-3p	-1.02634	2.11806e-12	1.26519e-11
hsa-miR-1468-5p	-1.02014	1.47245e-08	5.45171e-08
hsa-miR-24-1-5p	-1.01608	2.54799e-11	1.3753e-10
hsa-miR-491-5p	-1.01565	3.14654e-10	1.43842e-09
hsa-miR-20b-5p	-1.01066	2.96638e-05	6.74589e-05
hsa-miR-28-5p	-1.00351	1.23586e-18	1.53796e-17
hsa-miR-20a-5p	1.00562	2.06337e-08	7.51535e-08
hsa-miR-708-3p	1.01594	5.11206e-06	1.33151e-05
hsa-miR-500a-3p	1.02835	7.19121e-14	5.03385e-13
hsa-miR-222-5p	1.03229	4.22181e-07	1.32264e-06
hsa-miR-1307-3p	1.04749	7.31838e-14	5.04406e-13
hsa-miR-222-3p	1.05644	1.89402e-11	1.04755e-10
hsa-miR-671-5p	1.06856	3.76234e-11	1.93739e-10
hsa-miR-17-5p	1.07672	2.12944e-11	1.1634e-10
hsa-miR-550a-5p	1.08051	8.86874e-09	3.31099e-08
hsa-miR-3934-5p	1.08266	4.45366e-07	1.38558e-06
hsa-miR-584-5p	1.08397	3.18285e-06	8.66531e-06
hsa-miR-19b-1-5p	1.087	5.54837e-11	2.73151e-10
hsa-miR-1301-3p	1.10002	2.90763e-11	1.55073e-10
hsa-miR-93-5p	1.10128	7.16866e-13	4.58794e-12
hsa-miR-501-5p	1.12087	1.61066e-09	6.55977e-09
hsa-miR-508-3p	1.16678	0.000221583	0.000461717
hsa-miR-210-3p	1.17466	0.000418783	0.000815717
hsa-miR-130b-5p	1.18612	1.25416e-09	5.25108e-09
hsa-miR-708-5p	1.20058	7.91525e-08	2.68639e-07
hsa-miR-4661-5p	1.20134	1.32693e-06	3.86016e-06
hsa-miR-4326	1.2362	0.000308381	0.000619528
hsa-miR-181a-3p	1.24029	1.7993e-21	4.24257e-20
hsa-miR-130b-3p	1.25968	7.51126e-12	4.25955e-11
hsa-miR-19a-3p	1.31573	5.99021e-14	4.25971e-13
hsa-miR-500b-3p	1.35303	2.12581e-10	9.92043e-10
hsa-miR-215-5p	1.35733	0.000732735	0.00136777
hsa-miR-146b-3p	1.3817	8.06324e-20	1.29012e-18
hsa-miR-501-3p	1.39688	4.40507e-16	4.58947e-15
hsa-miR-203b-3p	1.40975	0.000142706	0.00030197
hsa-miR-142-3p	1.41639	3.33512e-10	1.49413e-09
hsa-miR-188-5p	1.42684	2.83401e-13	1.86711e-12
hsa-miR-92a-1-5p	1.44027	9.59833e-11	4.57452e-10
hsa-miR-577	1.45446	0.000249753	0.000513255
hsa-miR-181b-3p	1.48065	2.56736e-12	1.51339e-11
hsa-miR-18a-3p	1.48535	4.73685e-10	2.0603e-09
hsa-miR-877-5p	1.5121	2.87865e-10	1.32952e-09
hsa-miR-21-3p	1.52583	3.32344e-25	1.14531e-23
hsa-miR-7-5p	1.53479	3.59928e-08	1.25975e-07
hsa-miR-509-3p	1.56965	1.55942e-06	4.4498e-06
hsa-miR-200c-5p	1.58907	6.22049e-12	3.57279e-11
hsa-miR-335-3p	1.62803	3.29009e-15	2.83454e-14
hsa-miR-937-3p	1.64138	2.54388e-09	1.01755e-08
hsa-miR-503-5p	1.65199	4.37979e-14	3.16475e-13
hsa-miR-200b-5p	1.65975	6.65412e-11	3.20543e-10
hsa-miR-935	1.67057	3.53547e-06	9.42791e-06
hsa-miR-18a-5p	1.67782	6.18572e-16	6.10463e-15
hsa-miR-615-3p	1.68368	1.77856e-07	5.85878e-07
hsa-miR-431-5p	1.73023	5.07608e-16	5.16837e-15
hsa-miR-182-5p	1.74296	2.4467e-16	2.60982e-15
hsa-miR-21-5p	1.77238	2.03346e-43	9.10991e-41
hsa-miR-200c-3p	1.80707	6.26814e-16	6.10463e-15
hsa-miR-146b-5p	1.82644	5.39633e-29	4.83511e-27
hsa-miR-192-3p	1.91271	5.41873e-11	2.69732e-10
hsa-miR-141-3p	1.94924	2.29218e-15	2.05379e-14
hsa-miR-96-5p	1.96139	3.18763e-15	2.80011e-14
hsa-miR-592	1.96678	3.68204e-10	1.63322e-09
hsa-miR-429	2.0433	7.81715e-14	5.30619e-13
hsa-miR-200b-3p	2.12426	1.36105e-19	1.96694e-18
hsa-miR-141-5p	2.13911	2.85271e-20	4.91544e-19
hsa-miR-200a-3p	2.15483	1.9721e-17	2.325e-16
hsa-miR-183-5p	2.17126	1.02908e-20	1.92095e-19
hsa-miR-200a-5p	2.29321	3.24717e-22	8.55724e-21
hsa-miR-135b-3p	2.32116	1.15014e-18	1.47218e-17
hsa-miR-192-5p	2.32969	5.22263e-17	5.84935e-16
hsa-miR-194-3p	2.35863	7.18724e-16	6.85082e-15
hsa-miR-194-5p	2.38935	1.11841e-19	1.67016e-18
hsa-miR-552-5p	3.11681	2.10483e-06	5.89353e-06
hsa-miR-135b-5p	3.33668	6.84259e-21	1.33282e-19
hsa-miR-196b-5p	4.22823	8.18765e-22	2.03781e-20
hsa-miR-196a-5p	4.8772	8.03364e-27	3.59907e-25

## Sheet: DElncRNAs
Table S1
GeneID	symbol	PValue	FDR
ENSG00000152931	PART1	3.90575e-25	7.59716e-23
ENSG00000268388	FENDRR	2.30547e-14	5.41107e-13
ENSG00000224078	SNHG14	1.62222e-15	4.79002e-14
ENSG00000249669	CARMN	3.48245e-10	3.53955e-09
ENSG00000166770	ZNF667-AS1	5.95445e-16	1.92235e-14
ENSG00000232229	LINC00865	7.90137e-13	1.36615e-11
ENSG00000255248	MIR100HG	1.50135e-09	1.33998e-08
ENSG00000229619	MBNL1-AS1	3.4016e-11	4.20097e-10
ENSG00000281181	FP236383.3	2.44884e-05	9.26939e-05
ENSG00000167912	AC090152.1	1.5571e-11	2.08699e-10
ENSG00000233117	LINC00702	2.34748e-07	1.34397e-06
ENSG00000177133	LINC00982	2.82128e-07	1.58548e-06
ENSG00000259291	ZNF710-AS1	2.95899e-16	1.01402e-14
ENSG00000203706	SERTAD4-AS1	7.96201e-09	6.10329e-08
ENSG00000237807	AC022034.2	2.24341e-07	1.29104e-06
ENSG00000259319	AF111167.2	5.01649e-22	5.53628e-20
ENSG00000215386	MIR99AHG	6.28527e-07	3.31318e-06
ENSG00000186594	MIR22HG	1.52672e-27	4.09608e-25
ENSG00000258498	DIO3OS	3.4429e-06	1.55741e-05
ENSG00000235314	LINC00957	3.34347e-20	2.7383e-18
ENSG00000250303	AP002884.3	1.67343e-15	4.90956e-14
ENSG00000237187	NR2F1-AS1	6.29793e-11	7.41878e-10
ENSG00000272734	ADIRF-AS1	5.84696e-11	6.94008e-10
ENSG00000272870	AC097534.2	7.22396e-16	2.29923e-14
ENSG00000250742	LINC02381	7.36276e-06	3.10073e-05
ENSG00000257698	AC084033.3	2.43531e-12	3.78958e-11
ENSG00000203709	C1orf132	5.28403e-11	6.32986e-10
ENSG00000235501	AC105942.1	7.19213e-11	8.42747e-10
ENSG00000281383	FP671120.4	3.25916e-07	1.80934e-06
ENSG00000180139	ACTA2-AS1	1.04417e-05	4.27361e-05
ENSG00000251615	AC104825.2	2.82367e-10	2.91567e-09
ENSG00000259663	AC010478.1	0.000609669	0.00166323
ENSG00000223764	AL645608.1	5.28515e-06	2.2947e-05
ENSG00000234456	MAGI2-AS3	2.06649e-08	1.45571e-07
ENSG00000269386	RAB11B-AS1	8.40625e-21	7.34886e-19
ENSG00000272631	AC067750.1	1.10882e-08	8.23443e-08
ENSG00000272106	AL691432.2	1.0852e-22	1.30906e-20
ENSG00000235652	AL356599.1	2.90547e-11	3.65202e-10
ENSG00000239911	PRKAG2-AS1	5.21923e-06	2.26988e-05
ENSG00000250208	FZD10-AS1	0.000157424	0.000496087
ENSG00000180769	WDFY3-AS2	1.05883e-10	1.18195e-09
ENSG00000247516	MIR4458HG	2.92314e-06	1.34378e-05
ENSG00000232160	RAP2C-AS1	4.9592e-11	5.95908e-10
ENSG00000260686	AC008669.1	3.81208e-08	2.53287e-07
ENSG00000230513	THAP7-AS1	2.73596e-09	2.29883e-08
ENSG00000265519	AC015922.3	1.70819e-05	6.69719e-05
ENSG00000224152	AC009506.1	5.63772e-14	1.22869e-12
ENSG00000269293	ZSCAN16-AS1	4.51289e-11	5.46925e-10
ENSG00000268061	NAPA-AS1	3.00699e-15	8.28172e-14
ENSG00000260912	AL158206.1	7.31022e-05	0.000249571
ENSG00000272462	U91328.2	2.74518e-07	1.54607e-06
ENSG00000259865	AL390728.6	1.79666e-06	8.64232e-06
ENSG00000228109	MELTF-AS1	4.73729e-07	2.55695e-06
ENSG00000260711	AL121839.2	0.000123146	0.000398644
ENSG00000261971	MMP25-AS1	1.14749e-06	5.77134e-06
ENSG00000261061	AC092718.4	2.22632e-07	1.28215e-06
ENSG00000262580	AC087741.1	1.09196e-05	4.45165e-05
ENSG00000257167	TMPO-AS1	5.6752e-09	4.48511e-08
ENSG00000280734	LINC01232	4.93015e-07	2.64911e-06
ENSG00000250899	AC125807.2	3.73216e-09	3.06794e-08
ENSG00000225361	PPP1R26-AS1	2.2521e-07	1.29461e-06
ENSG00000253669	AP003356.1	3.35818e-05	0.000123305
ENSG00000261326	LINC01355	2.72734e-05	0.000101981
ENSG00000260942	CAPN10-AS1	1.80191e-09	1.58684e-08
ENSG00000260114	AC120114.2	1.55817e-13	3.0927e-12
ENSG00000257084	MIR200CHG	0.000378003	0.00108566
ENSG00000256967	AC018653.3	5.51474e-08	3.5593e-07
ENSG00000261572	AC097639.1	1.77287e-06	8.53578e-06
ENSG00000281376	ABALON	8.91227e-07	4.56214e-06
ENSG00000257298	AC008147.2	5.35787e-06	2.32239e-05
ENSG00000269821	KCNQ1OT1	0.000416982	0.00118428
ENSG00000246898	LINC00920	0.000203922	0.000626624
ENSG00000257702	LBX2-AS1	3.45313e-07	1.90817e-06
ENSG00000270605	AL353622.1	4.43905e-06	1.96071e-05
ENSG00000273142	AC073335.2	3.79814e-06	1.70276e-05
ENSG00000259933	AC009065.2	0.000525054	0.00145484
ENSG00000231731	AC010976.1	1.95798e-08	1.38617e-07
ENSG00000222041	CYTOR	1.59816e-08	1.14868e-07
ENSG00000272599	AC016394.1	2.45115e-10	2.56161e-09
ENSG00000260418	AL023284.4	9.42987e-06	3.89226e-05
ENSG00000206337	HCP5	3.17358e-06	1.44736e-05
ENSG00000260704	LINC00543	0.00270349	0.00630531
ENSG00000273478	AC099676.1	5.3911e-10	5.23664e-09
ENSG00000267751	AC009005.1	5.97506e-05	0.000207772
ENSG00000277287	AL109976.1	8.80621e-05	0.000295458
ENSG00000277938	AL035252.3	1.80469e-07	1.05456e-06
ENSG00000262188	LINC01978	0.000731923	0.00195964
ENSG00000274964	AC026356.1	1.1791e-12	1.97078e-11
ENSG00000262714	AC007342.5	0.00208929	0.00501565
ENSG00000246582	AC100861.1	1.3622e-09	1.2274e-08
ENSG00000231607	DLEU2	3.69129e-10	3.73716e-09
ENSG00000253522	MIR3142HG	9.06528e-05	0.00030343
ENSG00000175772	LINC01106	9.39508e-09	7.08661e-08
ENSG00000204588	LINC01123	1.12681e-08	8.34437e-08
ENSG00000232445	AC006329.1	0.00018939	0.000584741
ENSG00000251169	LINC01843	5.62245e-05	0.000196874
ENSG00000277534	AC007996.1	1.11417e-08	8.25996e-08
ENSG00000251442	LINC01094	1.31526e-08	9.5998e-08
ENSG00000280693	SH3PXD2A-AS1	0.000992363	0.00257155
ENSG00000229152	ANKRD10-IT1	2.63408e-10	2.73807e-09
ENSG00000215417	MIR17HG	5.08314e-07	2.72379e-06
ENSG00000278709	NKILA	1.72967e-05	6.77458e-05
ENSG00000261488	AC128688.2	3.82465e-06	1.71267e-05
ENSG00000278192	AL118505.1	2.10884e-06	9.97742e-06
ENSG00000233098	CCDC144NL-AS1	0.000184806	0.000572519
ENSG00000281398	SNHG4	1.69035e-11	2.24756e-10
ENSG00000261116	AL049555.1	7.66096e-05	0.000260346
ENSG00000261123	AC009065.5	3.17279e-05	0.00011705
ENSG00000261804	AC007342.4	0.000808403	0.00213938
ENSG00000273151	AC073957.3	2.1463e-08	1.50444e-07
ENSG00000249859	PVT1	3.02872e-09	2.52302e-08
ENSG00000273373	AL355488.2	2.57575e-10	2.68281e-09
ENSG00000229953	AL590666.2	5.7691e-05	0.000201465
ENSG00000197670	AL157838.1	7.79565e-12	1.11394e-10
ENSG00000231806	PCAT7	2.13573e-07	1.23547e-06
ENSG00000260196	AC124798.1	2.62469e-07	1.48574e-06
ENSG00000276980	AC008760.2	2.55109e-05	9.61431e-05
ENSG00000228709	AP001065.1	0.00155359	0.00384103
ENSG00000234753	FOXP4-AS1	5.85769e-07	3.1025e-06
ENSG00000276672	AL161891.1	3.83789e-14	8.63025e-13
ENSG00000275437	AL121832.3	1.25442e-09	1.13489e-08
ENSG00000272189	AL024508.2	1.48699e-07	8.82498e-07
ENSG00000281344	HELLPAR	6.31764e-09	4.95508e-08
ENSG00000224397	SMIM25	3.69377e-09	3.03799e-08
ENSG00000223813	AC007255.1	5.88786e-10	5.66962e-09
ENSG00000236008	LINC01814	2.49712e-10	2.6044e-09
ENSG00000254815	AP006284.1	1.87324e-08	1.33042e-07
ENSG00000232803	SLCO4A1-AS1	0.000182683	0.000566508
ENSG00000234155	LINC02535	0.000328064	0.000957787
ENSG00000272720	AL022322.1	2.42734e-13	4.64027e-12
ENSG00000265415	AC099850.3	6.06074e-17	2.4059e-15
ENSG00000204876	AC021218.1	0.000463244	0.00130048
ENSG00000261373	VPS9D1-AS1	8.01197e-09	6.13857e-08
ENSG00000261437	AC108860.2	1.55473e-11	2.08699e-10
ENSG00000254560	BBOX1-AS1	1.98215e-05	7.63473e-05
ENSG00000262585	LINC01979	2.0704e-08	1.45715e-07
ENSG00000177335	C8orf31	2.56921e-06	1.19591e-05
ENSG00000271936	AC012073.1	2.277e-24	4.12005e-22
ENSG00000272141	AL390719.2	9.57009e-09	7.20489e-08
ENSG00000255026	AC136475.3	9.47614e-06	3.90726e-05
ENSG00000272068	AL365181.2	2.17756e-05	8.32555e-05
ENSG00000172965	MIR4435-2HG	4.66635e-21	4.37428e-19
ENSG00000262001	DLGAP1-AS2	2.36613e-11	3.03039e-10
ENSG00000182912	TSPEAR-AS2	5.21498e-06	2.26867e-05
ENSG00000272405	AL365181.3	1.06775e-05	4.36211e-05
ENSG00000249007	AL691482.3	8.12171e-11	9.37552e-10
ENSG00000235142	LINC02532	0.000220537	0.000672899
ENSG00000243479	MNX1-AS1	2.61796e-13	4.95597e-12
ENSG00000274993	AC254629.1	6.42211e-06	2.73194e-05
ENSG00000229719	MIR194-2HG	7.62102e-08	4.78574e-07
ENSG00000237424	FOXD2-AS1	4.10584e-20	3.29335e-18
ENSG00000236081	ELFN1-AS1	8.3861e-07	4.31074e-06
ENSG00000237686	AL109615.3	1.31317e-12	2.16924e-11
ENSG00000226812	AL117382.1	1.99132e-10	2.11515e-09
ENSG00000214049	UCA1	0.000137975	0.000441413
ENSG00000270547	LINC01235	4.53116e-14	1.00013e-12
ENSG00000241388	HNF1A-AS1	1.11223e-08	8.24948e-08
ENSG00000206195	DUXAP8	1.07146e-11	1.47942e-10
ENSG00000274979	AC020656.2	1.19371e-08	8.81604e-08
ENSG00000249395	CASC9	3.94385e-06	1.76098e-05
ENSG00000281406	BLACAT1	6.5286e-13	1.14148e-11
ENSG00000254290	AC124067.4	2.5071e-07	1.42435e-06
ENSG00000244649	LINC02086	7.39789e-11	8.64254e-10
ENSG00000272763	AC103702.2	8.10729e-09	6.20548e-08
ENSG00000230061	TRPM2-AS	7.86589e-12	1.12089e-10
ENSG00000275216	AL161431.1	2.74207e-07	1.54543e-06
ENSG00000243766	HOTTIP	1.98936e-10	2.11451e-09
ENSG00000240990	HOXA11-AS	1.60843e-14	3.85059e-13
ENSG00000228630	HOTAIR	9.45868e-20	7.04242e-18
ENSG00000230316	FEZF1-AS1	8.19208e-16	2.55978e-14
